# Supplementary material for: X-shaped π-conjugated fluorophores enable cooperative ion-pair recognition with multicolour emission
Source: Royal Society of Chemistry journal article supplement (doi:10.1039/d5ob01696g), 2025-12-04
Supplement: d5ob01696g1.pdf [file d5ob01696g1.pdf]

## Electronic Supplementary Information

### X-shaped $\pi$ -conjugated fluorophores enable cooperative ion-pair recognition with multicolour emission

Ryota Tazawa, Kaho Watanabe, Kei Mizuguchi, Shoki Mizoguchi, Takayuki Chiba, Shuji Okada,  
and Ryohei Yamakado\*

*Department of Organic Materials Science, Graduate School of Organic Materials Science, Yamagata University,  
Yonezawa 992-8510, Japan*

#### Table of Contents

|                                                                                                                             |     |
|-----------------------------------------------------------------------------------------------------------------------------|-----|
| <b>1. Synthetic procedures and spectroscopic data</b>                                                                       | S2  |
| Fig. S1–14 $^1\text{H}$ and $^{13}\text{C}$ NMR spectra.                                                                    | S6  |
| <b>2. Optical properties</b>                                                                                                |     |
| Fig. S15–16 UV/vis absorption and photoluminescence spectra                                                                 | S15 |
| <b>3. Ion-binding properties</b>                                                                                            |     |
| Fig. S17–19 $^{11}\text{B}$ NMR spectral changes upon the addition of $\text{CN}^-$ as TBA salt                             | S16 |
| Fig. S20 $^1\text{H}$ NMR spectral changes upon the addition of $\text{CN}^-$ as TBA salt                                   | S17 |
| Fig. S21–24 $^1\text{H}$ NMR spectral changes upon the addition of $\text{K}^+$ as $\text{PF}_6$ salt                       | S18 |
| Fig. S25–35 UV/vis absorption and fluorescence spectral changes upon the addition of ion pair                               | S20 |
| Fig. S36 Emission colour coordinates                                                                                        | S25 |
| Fig. S37 Photographs of <b>L1</b> , <b>L2</b> , and <b>X1</b> with various ion pairs under visible light and UV irradiation | S26 |
| <b>4. Theoretical calculations</b>                                                                                          |     |
| Fig. S38–40 Optimized structures                                                                                            | S27 |
| Fig. S41–43 Frontier molecular orbitals                                                                                     | S28 |
| Fig. S44–45 Electron density diagrams                                                                                       | S28 |
| Fig. S46–47 Simulated $^1\text{H}$ NMR spectra                                                                              | S29 |

# 1. Synthetic procedures and spectroscopic data

## General procedures.

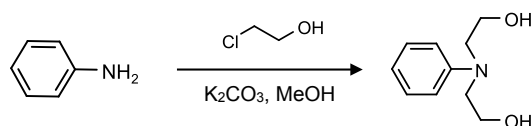

### 2-[(2-Hydroxyethyl)(phenyl)amino]ethan-1-ol<sup>[S1]</sup>

2-Chloroethanol (4.2 mL, 43.6 mmol) was added to a solution of aniline (1.0 mL, 10.9 mmol) and K<sub>2</sub>CO<sub>3</sub> (4.45 g, 3.22 mmol) in MeOH (5 mL), and the mixture was stirred overnight at 40 °C. When the reaction was completed, the mixture was diluted with cold water (10 mL), and stirred for 5 minute. The mixture was extracted with CH<sub>2</sub>Cl<sub>2</sub> and the organic layer was washed with cold water. A combined organic phase was dried over Na<sub>2</sub>SO<sub>4</sub> and solvents were removed by a rotary evaporator. The residue was chromatographed over silica gel column (SiO<sub>2</sub>; eluent: hexane/ EtOAc = 1/2) to afford 2-[(2-hydroxyethyl)(phenyl)amino]ethan-1-ol as a white solid (0.81 g, 4.46 mmol, 39%).

<sup>1</sup>H-NMR (500 MHz, CDCl<sub>3</sub>, δ) 7.23 (2H, dd, *J* = 8.6, 7.2 Hz), 6.74 (1H, t, *J* = 7.2 Hz), 6.69 (2H, d, *J* = 8.6 Hz), 3.85 (4H, t, *J* = 4.9 Hz), 3.58 (4H, t, *J* = 4.9 Hz), 3.41 (2H, s)

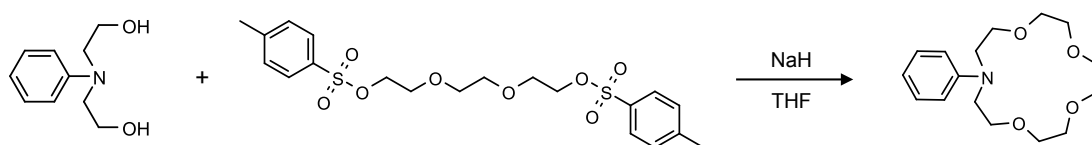

### 13-Phenyl-1,4,7,10-tetraoxa-13-azacyclopentadecane<sup>[S2]</sup>

NaH (1.54 g, 38.0 mmol) was added to a solution of 2-[(2-hydroxyethyl)(phenyl)amino]ethan-1-ol (5.50 g, 30.0 mmol) in dry THF (400 mL) and heated at reflux temperature. Then the solution of triethyleneglycolbis(*p*-toluenesulfonate) (4.30 g, 9.37 mmol) in dry THF (300 mL) was slowly added dropwise to the reaction mixture, and refluxing was continued for another 24 h. When the reaction was completed, the mixture cooled, then filtered and washed with THF. The solvents were removed by a rotary evaporator and the residue was chromatographed over silica gel column (SiO<sub>2</sub>; eluent: EtOAc/ CH<sub>2</sub>Cl<sub>2</sub> = 1:9, *R*<sub>f</sub> = 0.3) to afford 13-phenyl-1,4,7,10-tetraoxa-13-azacyclopentadecane as a white liquid (1.68 g, 5.70 mmol, 61%).

<sup>1</sup>H-NMR (400 MHz, CDCl<sub>3</sub>, δ) 7.21 (2H, t, *J* = 7.8 Hz), 6.66 (3H, t, *J* = 4.3 Hz), 3.76 (4H, t, *J* = 6.2 Hz), 3.66 (12H, m), 3.60 (4H, t, *J* = 6.2 Hz)

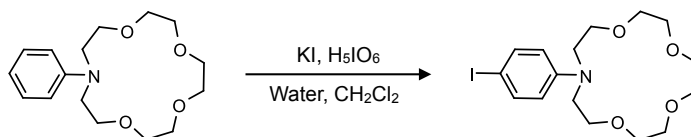

### 13-(4-Iodophenyl)-1,4,7,10-tetraoxa-13-azacyclopentadecane<sup>[S2]</sup>

13-Phenyl-1,4,7,10-tetraoxa-13-azacyclopentadecane (0.260 g, 0.880 mmol) in CH<sub>2</sub>Cl<sub>2</sub> (3 mL) were added to KI (0.175 g, 1.05 mmol) and H<sub>5</sub>IO<sub>6</sub> (0.134 g, 0.588 mmol) in H<sub>2</sub>O (3 mL). The mixture was stirred vigorously for 2 h at r.t. When the reaction was completed, the mixture was washed with aq. Na<sub>2</sub>S<sub>2</sub>O<sub>3</sub> (10%). The aqueous fraction was extracted with CH<sub>2</sub>Cl<sub>2</sub>. The organic layer was dried over Na<sub>2</sub>SO<sub>4</sub>, and the solvent was removed by a rotary evaporator. The residue was chromatographed over silica gel column (SiO<sub>2</sub>; eluent: CHCl<sub>3</sub>/MeOH = 10:1, *R*<sub>f</sub> = 0.5) to afford 13-(4-iodophenyl)-1,4,7,10-tetraoxa-13-azacyclopentadecane as a brown liquid (0.321 g, 0.761 mmol, 87%).

<sup>1</sup>H-NMR (500 MHz, CDCl<sub>3</sub>, δ) 7.43 (2H, dd, *J* = 6.9, 2.3 Hz), 6.44 (2H, dd, *J* = 6.9, 2.3 Hz), 3.72 (4H, t, *J* = 6.0 Hz), 3.68–3.63 (12H, m), 3.55 (4H, t, *J* = 6.0 Hz)

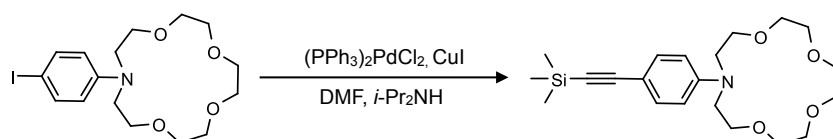

### 13-{4-[2-(Trimethylsilyl)ethynyl]phenyl}-1,4,7,10-tetraoxa-13-azacyclopentadecane<sup>[S2]</sup>

A mixture of 13-(4-iodophenyl)-1,4,7,10-tetraoxa-13-azacyclopentadecane (220 mg, 0.522 mmol), trimethylsilylacetylene (0.37 mL, 2.61 mmol), Pd(PPh<sub>3</sub>)<sub>2</sub>Cl<sub>2</sub> (37.0 mg, 0.0527 mmol), and CuI (10 mg, 0.0522 mmol) in 5 mL of *i*-Pr<sub>2</sub>NH and 15 mL of dry DMF was stirred in an atmosphere of N<sub>2</sub> at 70 °C for 24 h. When the reaction was

completed, the reaction mixture was cooled at r.t., and the solvent was removed by rotary evaporator. The residue was chromatographed over silica gel column (SiO<sub>2</sub>; eluent: EtOAc, *R<sub>f</sub>* = 0.5) to afford 13-{4-[2-(trimethylsilyl)ethynyl]phenyl}-1,4,7,10-tetraoxa-13-azacyclopentadecane as a brown liquid (0.183 g, 0.467 mmol, 90%). <sup>1</sup>H-NMR (400 MHz, CDCl<sub>3</sub>, δ) 7.30 (2H, d, *J* = 9.0 Hz), 6.55 (2H, d, *J* = 9.0 Hz), 3.74 (4H, t, *J* = 6.2 Hz), 3.66 (12H, m), 3.59 (4H, t, *J* = 6.2 Hz), 0.23 (9H, s)

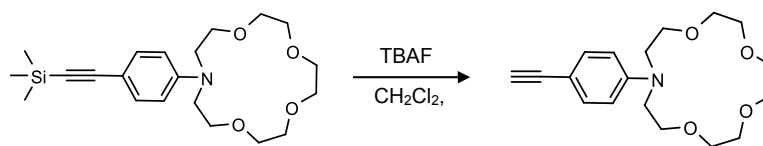

### 13-(4-Ethynylphenyl)-1,4,7,10-tetraoxa-13-azacyclopentadecane<sup>[S2]</sup>

TBAF (395 mg, 1.25 mmol) in CH<sub>2</sub>Cl<sub>2</sub> (10 mL) was added to a solution of 13-{4-[2-(trimethylsilyl)ethynyl]phenyl}-1,4,7,10-tetraoxa-13-azacyclopentadecane (170 mg, 0.434 mmol) in CH<sub>2</sub>Cl<sub>2</sub> (50 mL), and the mixture was stirred for 4 h at 0 °C. After dichloromethane was added, the reaction mixture was washed with water. A combined organic phase was dried over Na<sub>2</sub>SO<sub>4</sub>, and solvents were removed by a rotary evaporator. The residue was chromatographed over silica gel column (SiO<sub>2</sub>; eluent: EtOAc, *R<sub>f</sub>* = 0.5) to afford 13-(4-ethynylphenyl)-1,4,7,10-tetraoxa-13-azacyclopentadecane as a brown liquid (0.136 g, 0.425 mmol, 98%).

<sup>1</sup>H-NMR (600 MHz, CDCl<sub>3</sub>, δ) 7.33 (2H, d, *J* = 9.0 Hz), 6.58 (2H, d, *J* = 9.0 Hz), 3.74 (4H, t, *J* = 6.2 Hz), 3.68–3.63 (12H, m), 3.60 (4H, t, *J* = 6.2 Hz), 2.97 (1H, s)

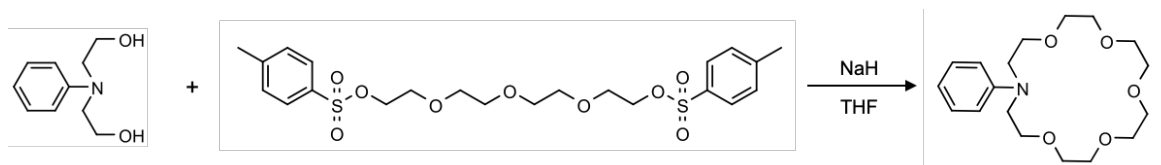

### 16-Phenyl-1,4,7,10,13-pentaoxa-16-azacyclooctadecane<sup>[S2]</sup>

NaH (781 mg, 19.6 mmol) was added to a solution of 2-[(2-hydroxyethyl)(phenyl)amino]ethan-1-ol (1.5 g, 8.28 mmol) in dry THF (300 mL) and heated at reflux temperature. Then the solution of tetraethyleneglycolbis(*p*-toluenesulfonate) (1.52 g, 3.31 mmol) in dry THF (80 mL) was slowly added dropwise to the reaction mixture, and refluxing was continued for another 24 h. When the reaction was completed, the mixture cooled, then filtered and washed with THF. The solvents were removed by a rotary evaporator and the residue was chromatographed over silica gel column (SiO<sub>2</sub>; eluent: EtOAc/MeOH = 10:1, *R<sub>f</sub>* = 0.2) to afford 16-phenyl-1,4,7,10,13-pentaoxa-16-azacyclooctadecane as a white liquid (0.598 g, 1.76 mmol, 21%).

<sup>1</sup>H-NMR (500 MHz, CDCl<sub>3</sub>, δ) 7.22–7.17 (2H, dd, *J* = 8.8, 7.3 Hz), 6.68 (2H, d *J* = 8.8 Hz), 6.65 (1H, d, *J* = 7.3 Hz), 3.71–3.61 (24H, m)

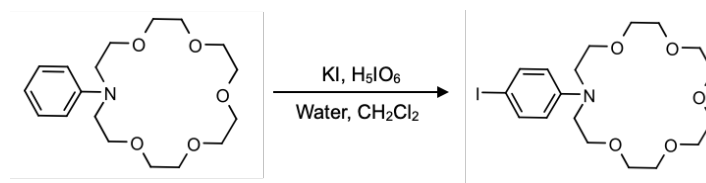

### 16-(4-Iodophenyl)-1,4,7,10,13-pentaoxa-16-azacyclooctadecane<sup>[S2]</sup>

16-Phenyl-1,4,7,10,13-pentaoxa-16-azacyclooctadecane (0.498 g, 1.47 mmol) in CH<sub>2</sub>Cl<sub>2</sub> (6 mL) were added KI (0.293 g, 1.77 mmol) and H<sub>5</sub>IO<sub>6</sub> (0.402 g, 1.77 mmol) in H<sub>2</sub>O (5 mL). The mixture was stirred vigorously for 2 h at r.t. When the reaction was completed, the mixture was washed with aq. Na<sub>2</sub>S<sub>2</sub>O<sub>3</sub> (10 wt%). The aqueous fraction was extracted with CH<sub>2</sub>Cl<sub>2</sub>. The organic layer was dried over Na<sub>2</sub>SO<sub>4</sub>, and the solvent was removed by a rotary evaporator. The residue was chromatographed over silica gel column (SiO<sub>2</sub>; eluent: EtOAc, *R<sub>f</sub>* = 0.3) to afford 16-(4-iodophenyl)-1,4,7,10,13-pentaoxa-16-azacyclooctadecane as a brown liquid (0.484 g, 1.04 mmol, 71%).

<sup>1</sup>H-NMR (500 MHz, CDCl<sub>3</sub>, δ) 7.42 (2H, dd, *J* = 6.9, 2.3 Hz), 6.47 (2H, dd, *J* = 6.9, 2.3 Hz), 3.68–3.56 (24H, m)

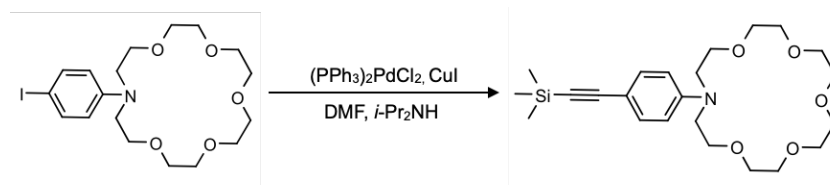

#### 16-{4-[2-(Trimethylsilyl)ethynyl]phenyl}-1,4,7,10,13-pentaoxa-16-azacyclooctadecane<sup>[S1]</sup>

A mixture of 16-(4-iodophenyl)-1,4,7,10,13-pentaoxa-16-azacyclooctadecane (0.300 g, 0.644 mmol), trimethylsilylacetylene (0.37 mL, 2.61 mmol), Pd(PPh<sub>3</sub>)<sub>2</sub>Cl<sub>2</sub> (45.2 mg, 0.0644 mol), and CuI (12.3 mg, 0.0644 mmol) in 7 mL of *i*-Pr<sub>2</sub>NH and 20 mL of dry DMF was stirred in an atmosphere of N<sub>2</sub> at 70 °C for 24 h. When the reaction was completed, the reaction mixture was cooled at r.t., and the solvent was removed by rotary evaporator. The residue was chromatographed over silica gel column (SiO<sub>2</sub>; eluent: EtOAc, *R<sub>f</sub>* = 0.3) to afford 16-{4-[2-(trimethylsilyl)ethynyl]phenyl}-1,4,7,10,13-pentaoxa-16-azacyclooctadecane as a brown liquid (0.265 g, 0.608 mmol, 94%).

<sup>1</sup>H-NMR (500 MHz, CDCl<sub>3</sub>, δ) 7.30 (2H, dd, *J* = 6.9, 2.3 Hz), 6.57 (2H, dd, *J* = 6.9, 2.3 Hz), 3.69–3.61 (24H, m), 0.22 (9H, s)

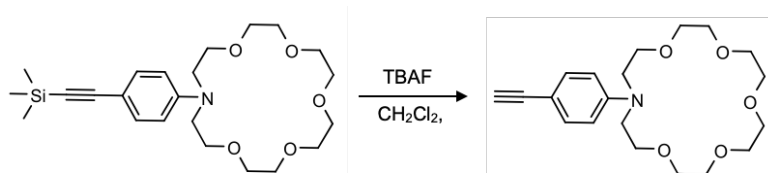

#### 16-(4-Ethynylphenyl)-1,4,7,10,13-pentaoxa-16-azacyclooctadecane<sup>[S2]</sup>

TBAF (0.520 g, 1.99 mmol) in CH<sub>2</sub>Cl<sub>2</sub> (10 mL) was added to a solution of 16-{4-[2-(trimethylsilyl)ethynyl]phenyl}-1,4,7,10,13-pentaoxa-16-azacyclooctadecane (0.260 g, 0.596 mmol) in CH<sub>2</sub>Cl<sub>2</sub> (50 mL), and the mixture was stirred for 4 h at 0 °C. After dichloromethane was added, the reaction mixture was washed with water. A combined organic phase was dried over Na<sub>2</sub>SO<sub>4</sub>, and solvents were removed by a rotary evaporator. The residue was chromatographed over silica gel column (SiO<sub>2</sub>; eluent: EtOAc, *R<sub>f</sub>* = 0.3) to afford 16-(4-ethynylphenyl)-1,4,7,10,13-pentaoxa-16-azacyclooctadecane as a brown liquid (0.209 g, 0.576 mmol, 97%).

<sup>1</sup>H-NMR (500 MHz, CDCl<sub>3</sub>, δ) 7.33 (2H, d, *J* = 8.9 Hz), 6.60 (2H, d, *J* = 8.9 Hz), 3.70–3.62 (24H, m), 2.97 (1H, s)

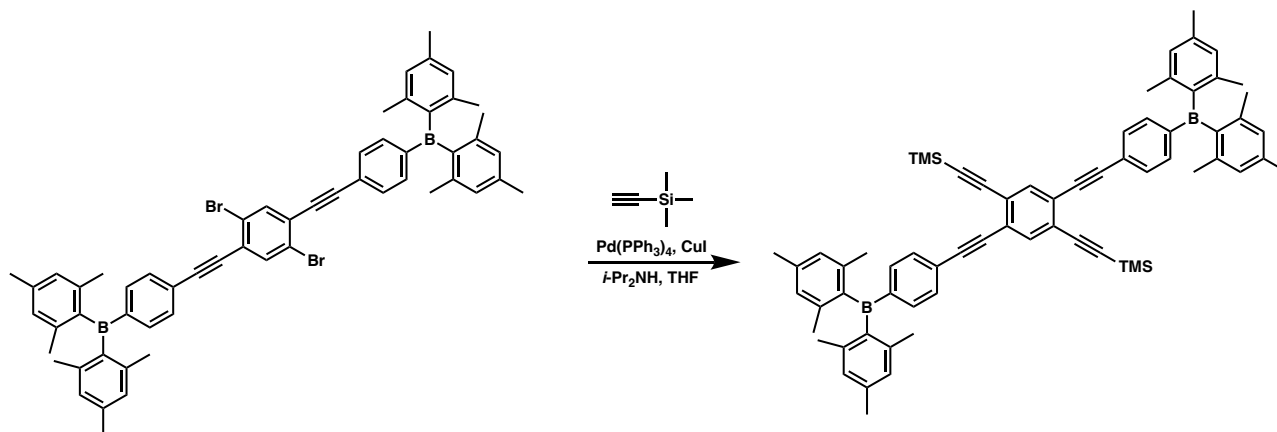

#### 1,4-Bis[(trimethylsilyl)ethynyl]-2,5-bis{[(4-dimesitylboryl)phenyl]ethynyl}benzene

A mixture of 1,4-dibromo-2,5-bis{[(4-dimesitylboryl)phenyl]ethynyl}benzene<sup>[S3]</sup> (0.360 g, 0.386 mmol), trimethylsilylacetylene (0.10 mL, 0.723 mmol), Pd(PPh<sub>3</sub>)<sub>4</sub> (108 mg, 0.0935 mol), and CuI (28 mg, 0.147 mmol) in 10 mL of *i*-Pr<sub>2</sub>NH and 10 mL of dry THF was stirred in an atmosphere of N<sub>2</sub> at 70 °C for 24 h. When the reaction was completed, the reaction mixture was cooled at r.t., and the solvent was removed by rotary evaporator. The residue was chromatographed over a silica gel column (SiO<sub>2</sub>; eluent: CH<sub>2</sub>Cl<sub>2</sub>/hexane = 1/6) to afford 1,4-Bis[(trimethylsilyl)ethynyl]-2,5-bis{[(4-dimesitylboryl)phenyl]ethynyl}benzene (178 mg, 0.184 mmol, 51 %) as a yellow solid.

<sup>1</sup>H NMR (400 Hz, CDCl<sub>3</sub>) δ (ppm): 7.68 (2H, s), 7.51 (8H, s), 6.84 (8H, s), 2.33 (12H, s), 2.01 (24H, s), 0.25 (18H, s)



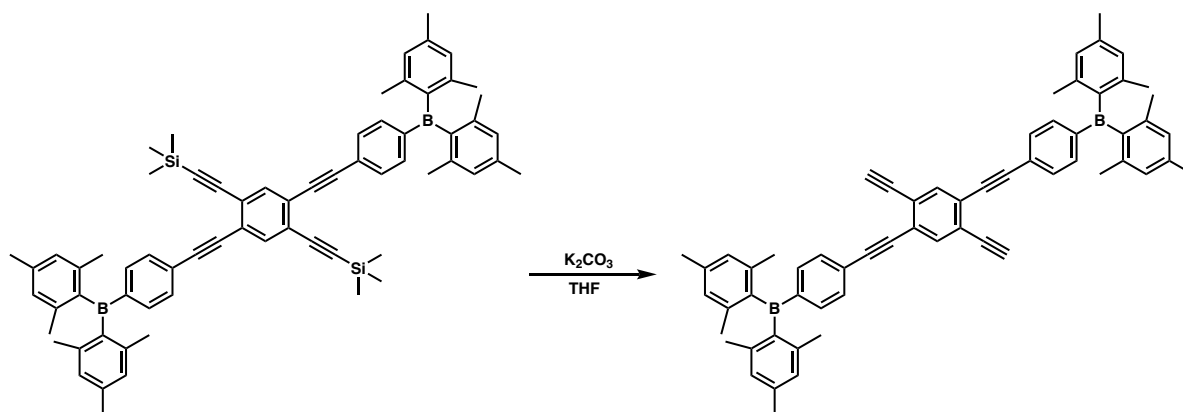

**1,4-Diethynyl-2,5-bis{[(4-dimesitylboryl)phenyl]ethynyl}benzene**

A mixture of 1,4-bis[(trimethylsilyl)ethynyl]-2,5-bis{[(4-dimesitylboryl)phenyl]ethynyl}benzene (0.176 g, 0.182 mmol) and  $K_2CO_3$  (812 mg, 5.87 mmol) in THF (2 mL) and MeOH (4 mL) was stirred at room temperature for 24 h. After dichloromethane was added, the reaction mixture was washed with  $NH_4Cl$  aq. A combined organic phase was dried over  $Na_2SO_4$ , with the solvent removed by a rotary evaporator. The residue was chromatographed over silica gel column ( $SiO_2$ ; eluent:  $CH_2Cl_2$ /hexane = 1/3,  $R_f$  = 0.4) to afford 1,4-diethynyl-2,5-bis{[(4-dimesitylboryl)phenyl]ethynyl}benzene as a brown solid (0.140 g, 0.177 mmol, 97%).

$^1H$  NMR (400 Hz,  $CDCl_3$ )  $\delta$  (ppm): 7.70 (2H, s), 7.51 (8H, s), 6.83 (8H, s), 3.45 (2H, s), 2.31 (12H, s), 2.00 (24H, s)

[S1] Bhange, D. S.; Sonawane, R. B.; Rasal, N. K.; Jagtap, S. V. *ChemistrySelect* **2020**, 5 (33), 10387–10390.

[S2] Paul, I.; Mittal, N.; De, S.; Bolte, M.; Schmittl, M. *J. Am. Chem. Soc.* **2019**, 141 (13), 5139–5143.

[S3] Morii, K.; Nabeta, H.; Yanbe, T.; Watanabe, K.; Sumikoshi, S.; Chiba, T.; Yamakado, R.; Okada, S. *ChemistrySelect* **2024**, 9 (1), e202305008.

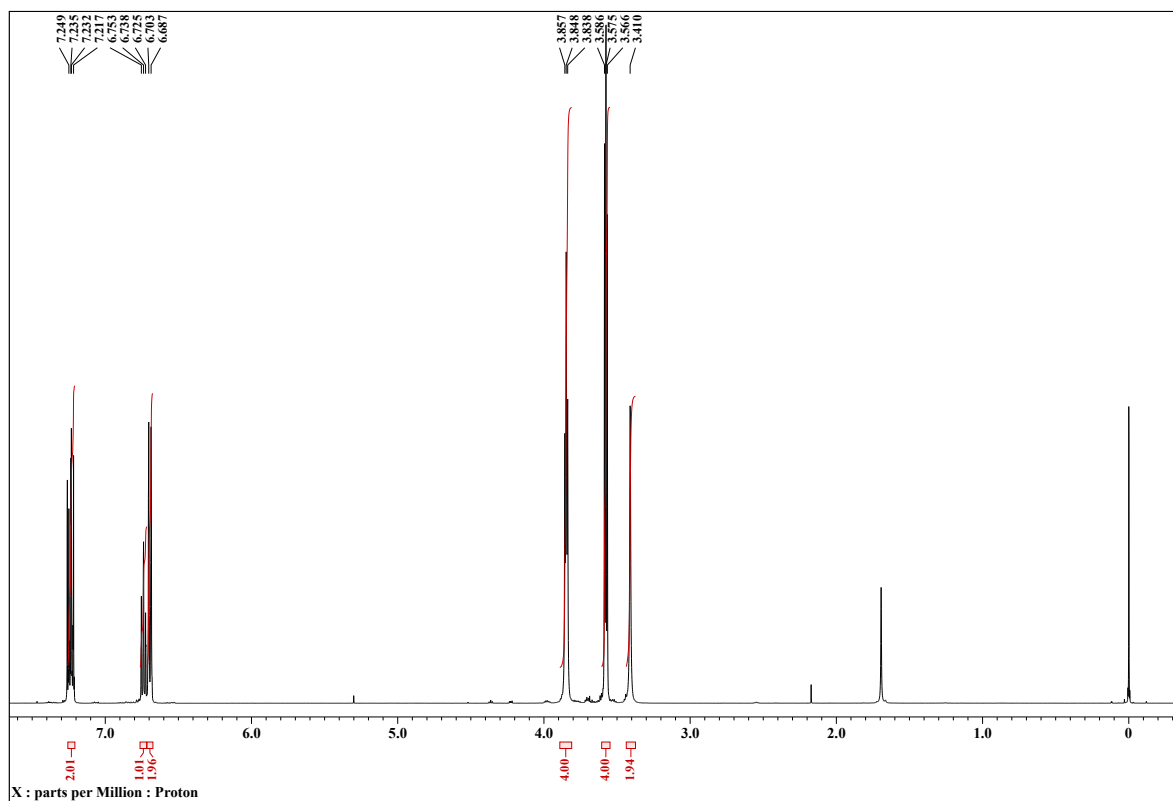

**Fig. S1**  $^1\text{H}$ -NMR spectrum of 2-[(2-hydroxyethyl)(phenyl)amino]ethan-1-ol in  $\text{CDCl}_3$ .

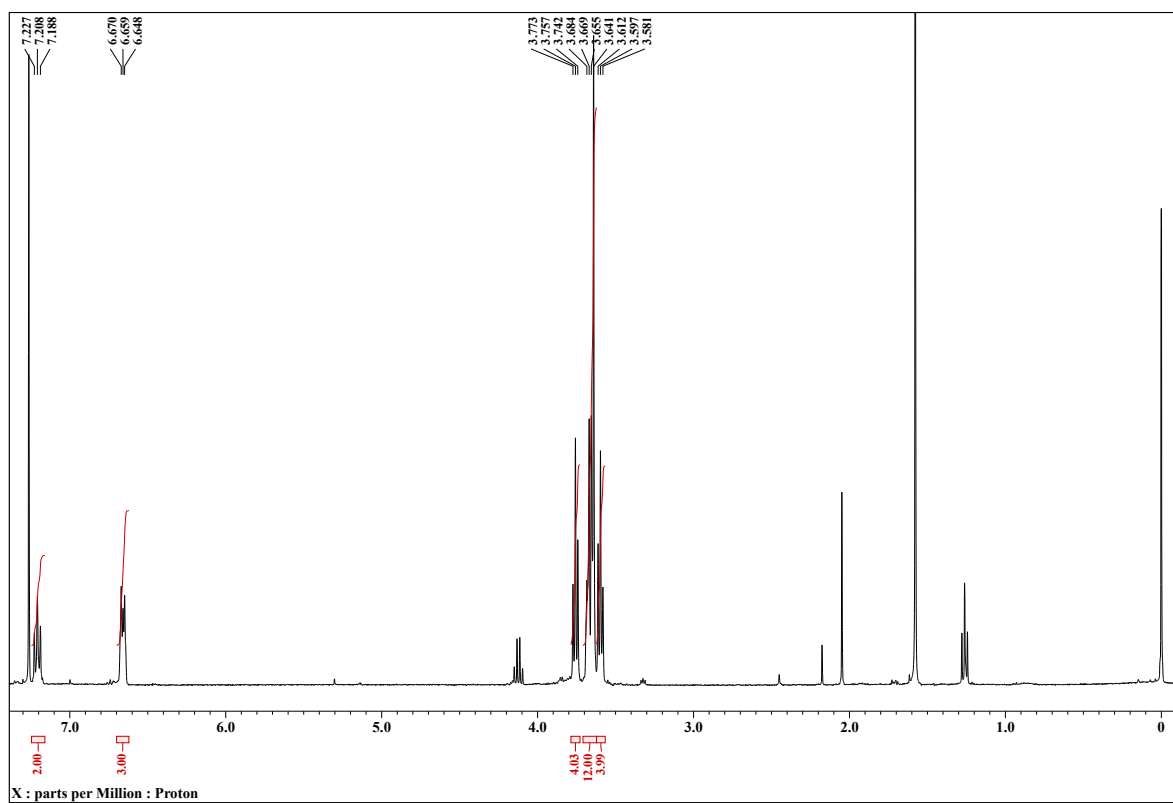

**Fig. S2**  $^1\text{H}$ -NMR spectrum of 13-phenyl-1,4,7,10-tetraoxa-13-azacyclopentadecane in  $\text{CDCl}_3$ .

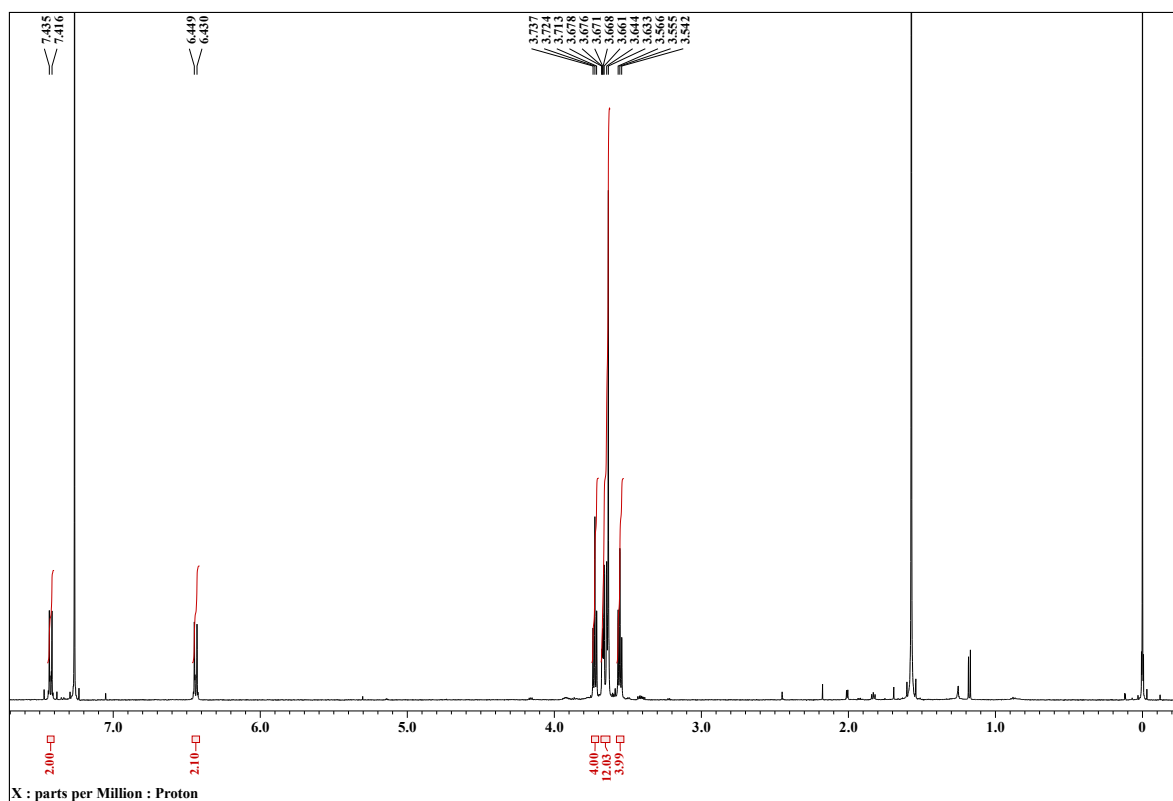

**Fig. S3** <sup>1</sup>H-NMR spectrum of 13-(4-iodophenyl)-1,4,7,10-tetraoxa-13-azacyclopentadecane in CDCl<sub>3</sub>.

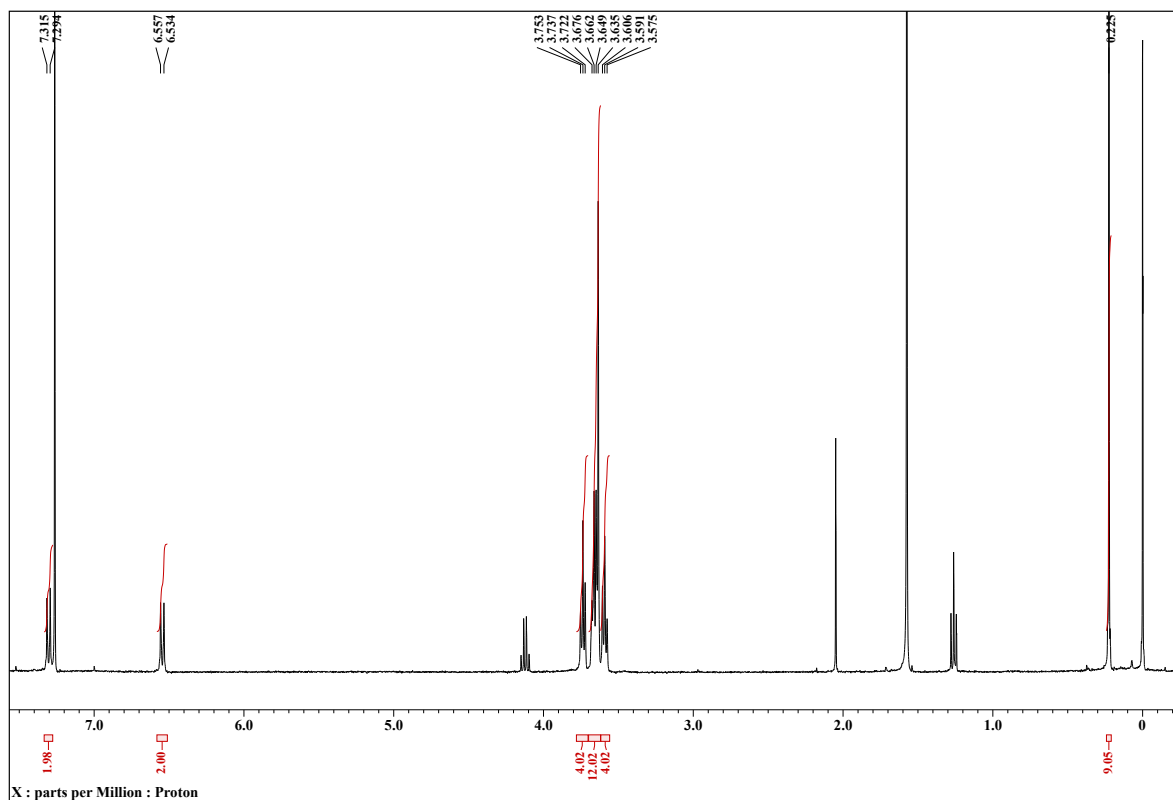

**Fig. S4** <sup>1</sup>H-NMR spectrum of 13-{4-[2-(trimethylsilyl)ethynyl]phenyl}-1,4,7,10-tetraoxa-13-azacyclopentadecane in CDCl<sub>3</sub>.

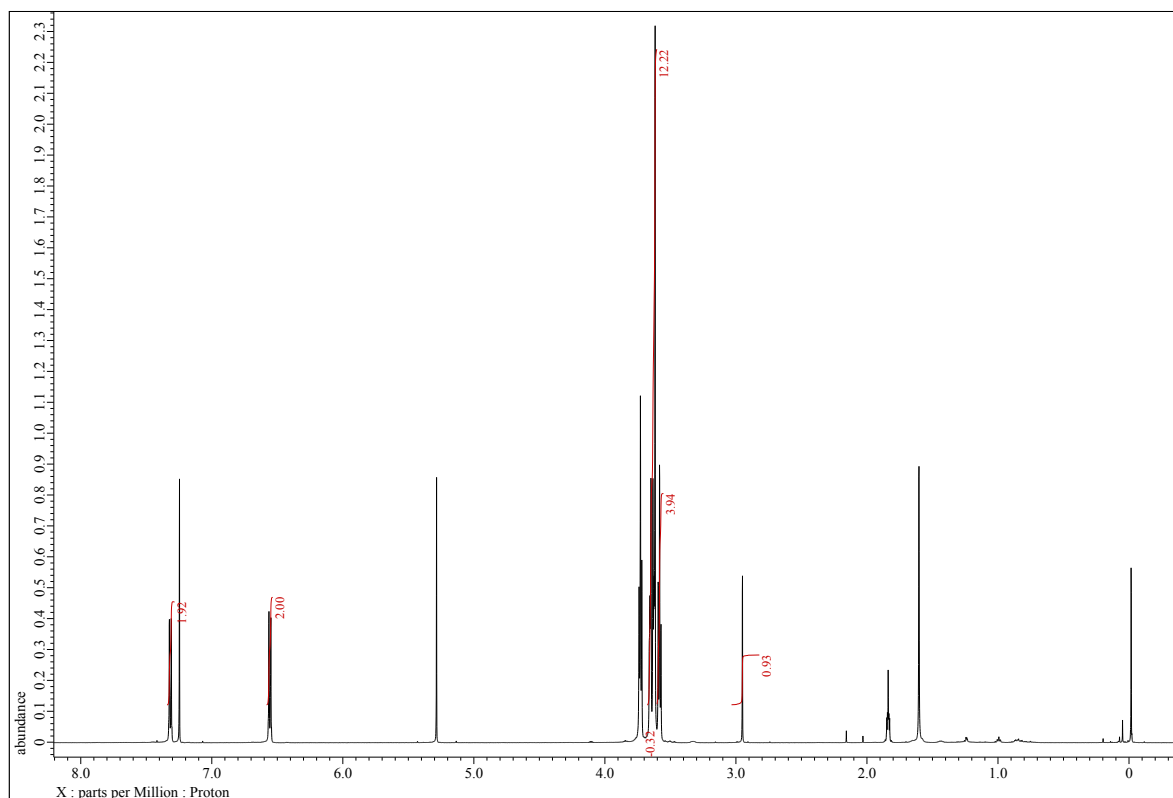

**Fig. S5**  $^1\text{H}$ -NMR spectrum of 13-(4-ethynylphenyl)-1,4,7,10-tetraoxa-13-azacyclopentadecane in  $\text{CDCl}_3$ .

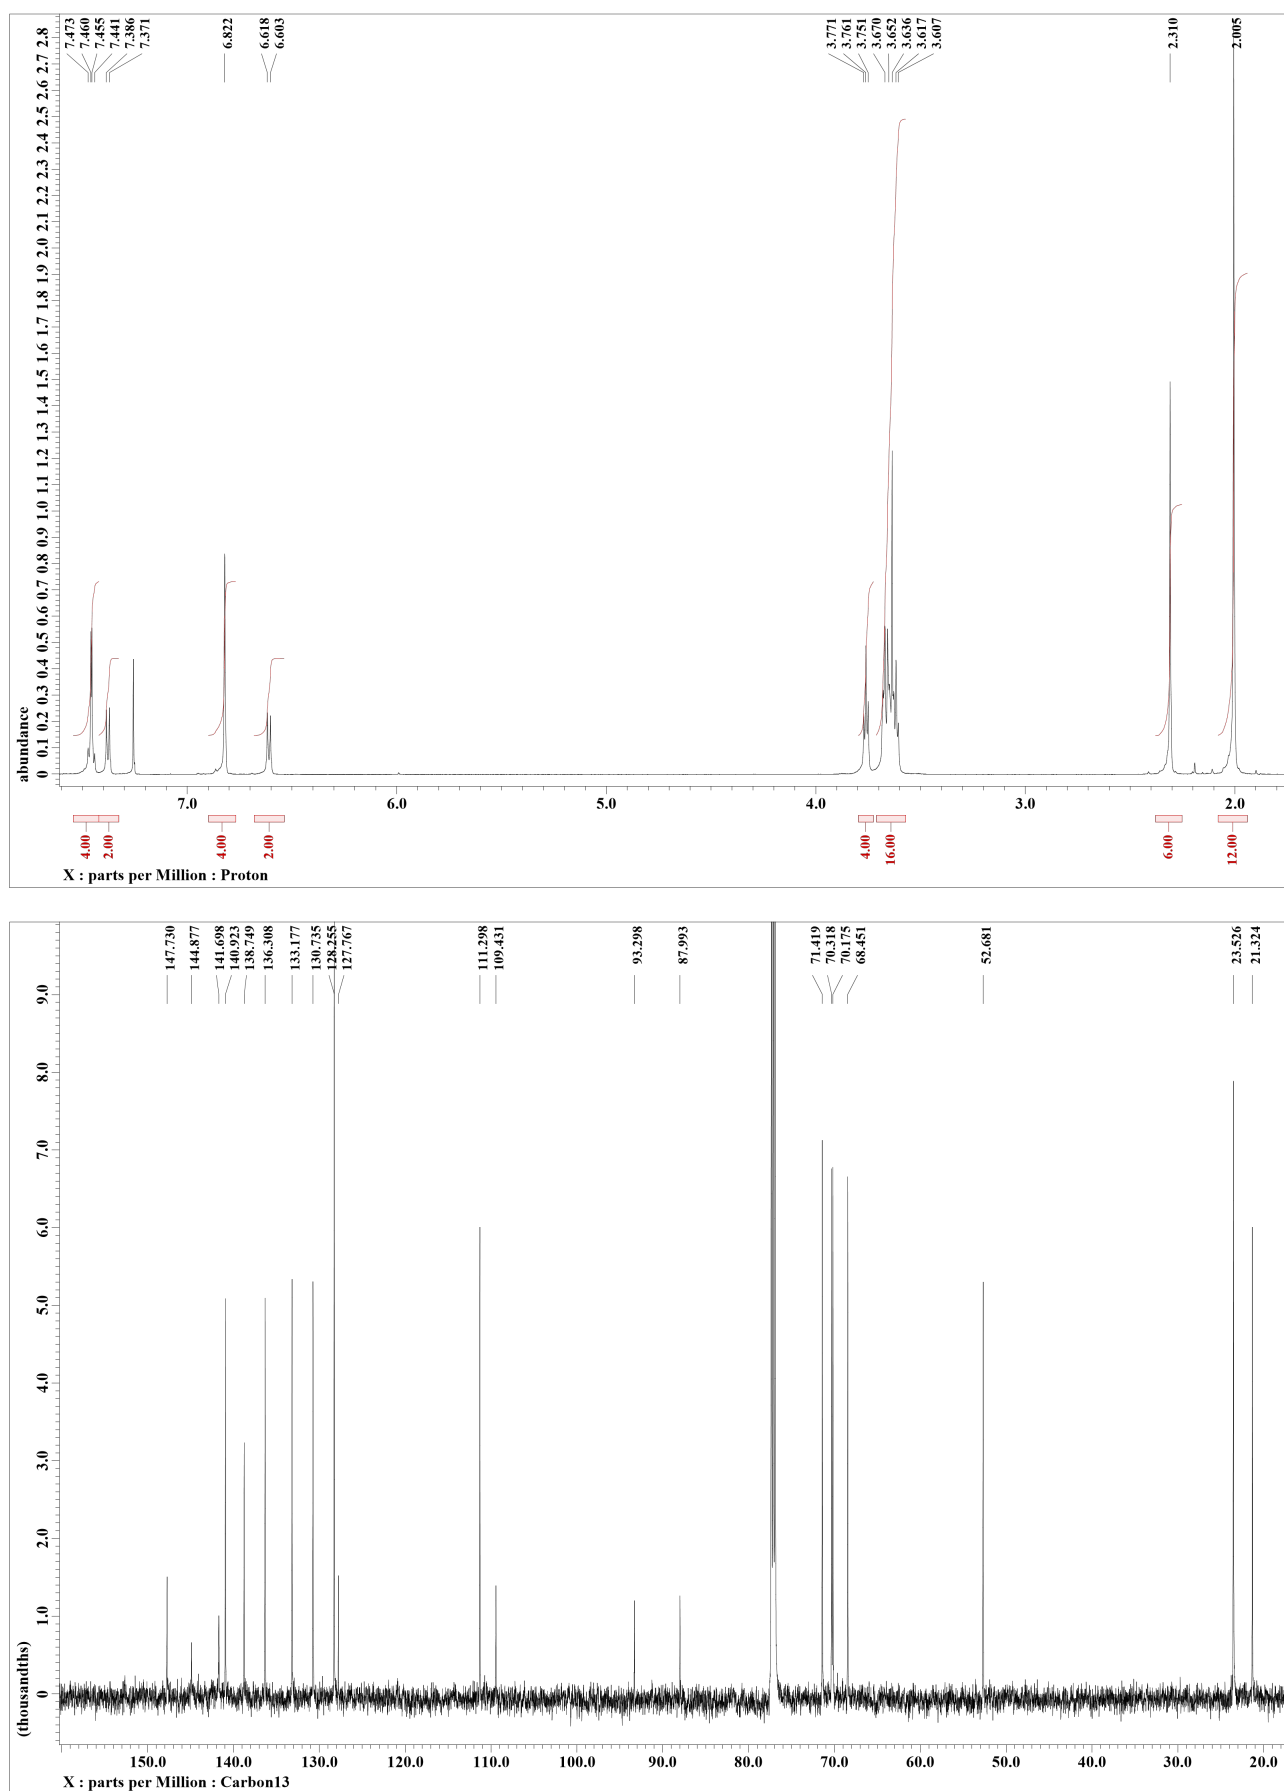

Fig. S6 <sup>1</sup>H (top) and <sup>13</sup>C (bottom) NMR spectra of L1 in CDCl<sub>3</sub>.

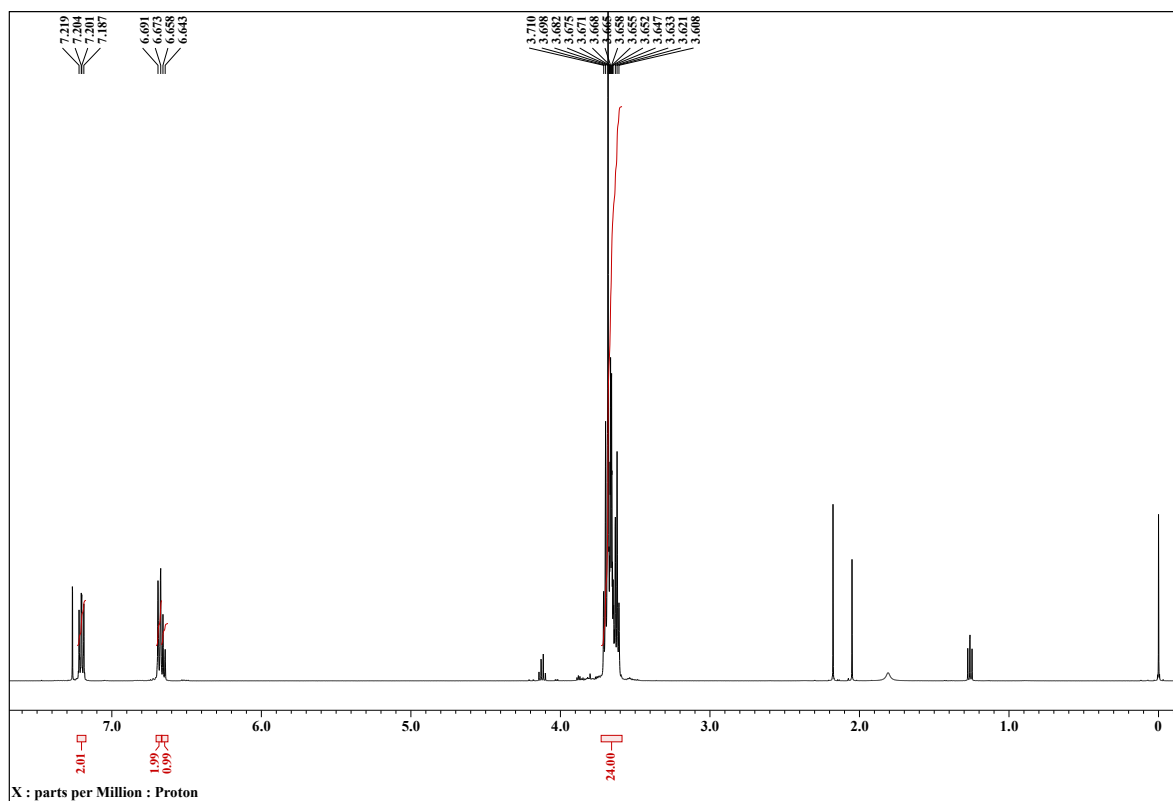

**Fig. S7** <sup>1</sup>H-NMR spectrum of 16-phenyl-1,4,7,10,13-pentaoxa-16-azacyclooctadecane in CDCl<sub>3</sub>.

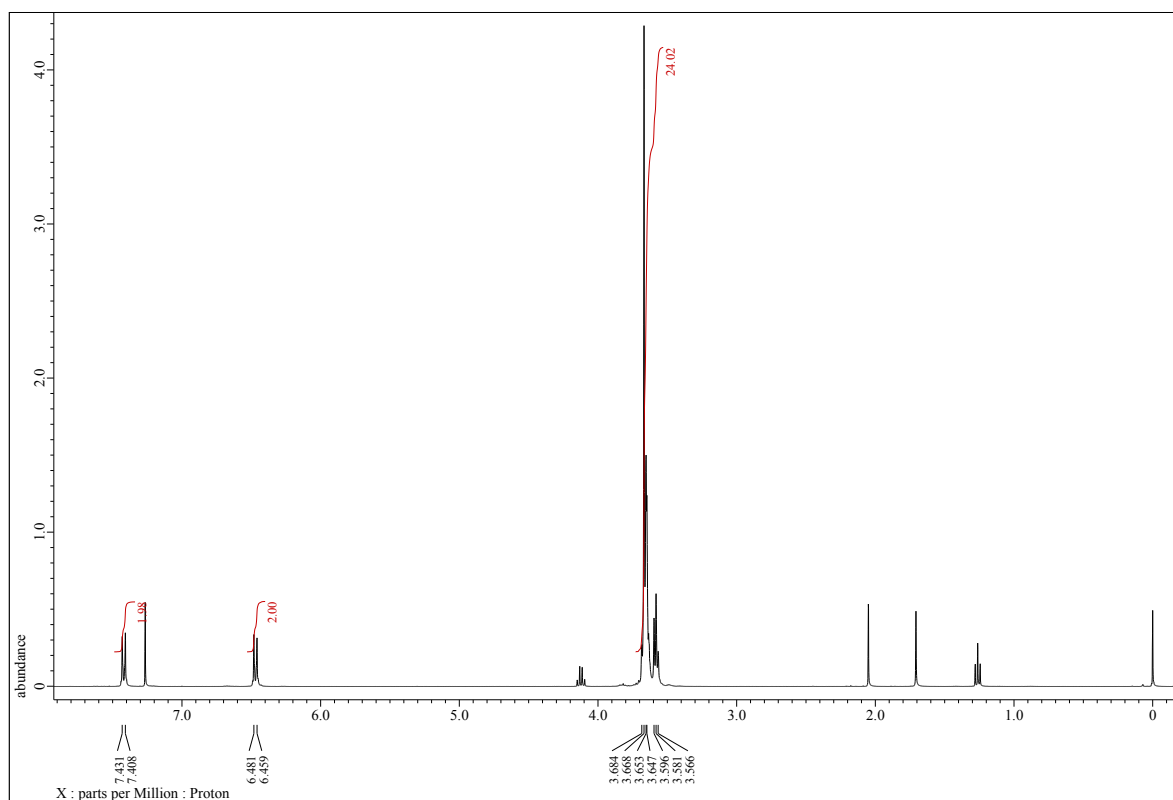

**Fig. S8** <sup>1</sup>H-NMR spectrum of 16-(4-iodophenyl)-1,4,7,10,13-pentaoxa-16-azacyclooctadecane in CDCl<sub>3</sub>.

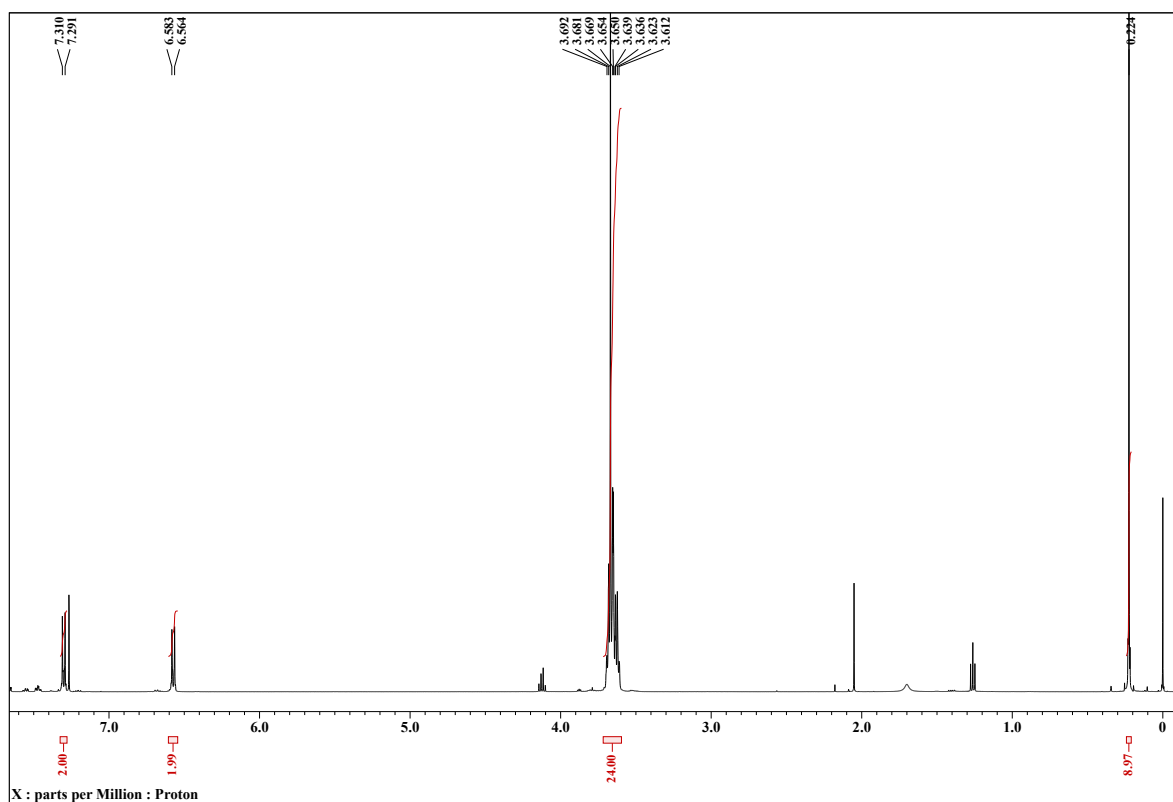

**Fig. S9** <sup>1</sup>H-NMR spectrum of 16-{4-[2-(trimethylsilyl)ethynyl]phenyl}-1,4,7,10,13-pentaoxa-16-azacyclooctadecane in CDCl<sub>3</sub>.

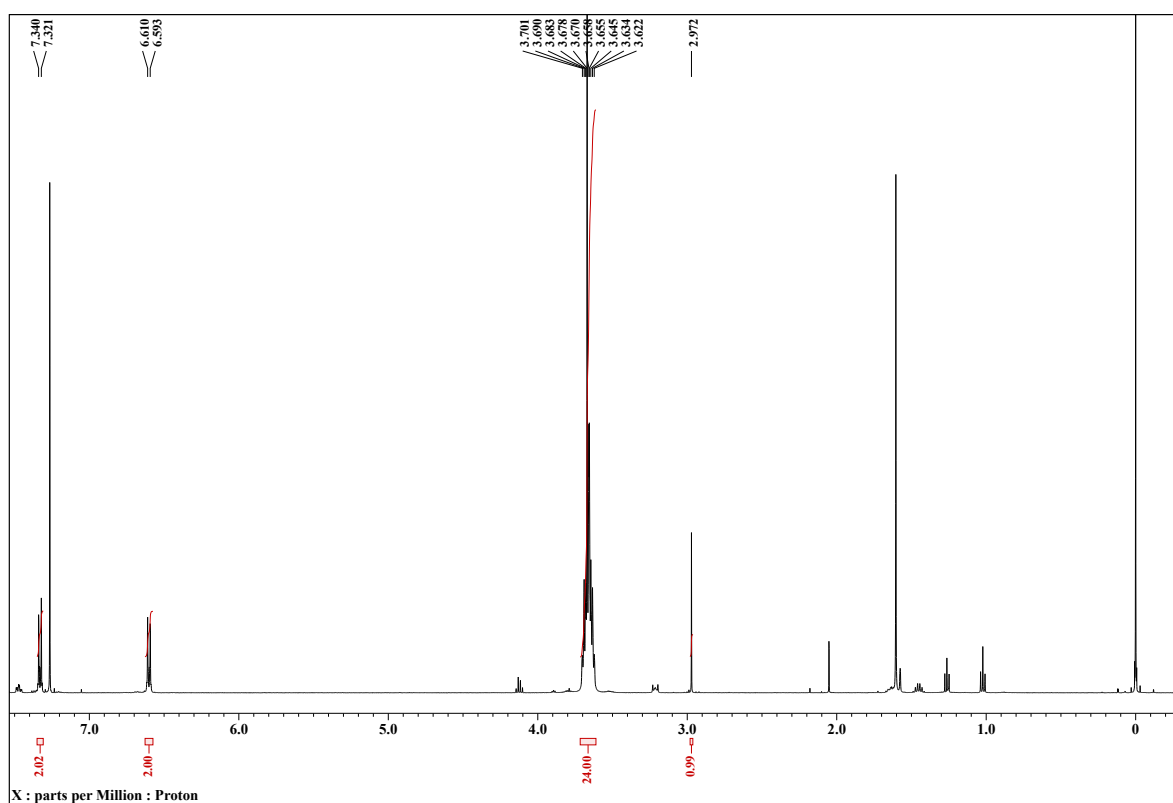

**Fig. S10** <sup>1</sup>H-NMR spectrum of 16-(4-ethynylphenyl)-1,4,7,10,13-pentaoxa-16-azacyclooctadecane in CDCl<sub>3</sub>.

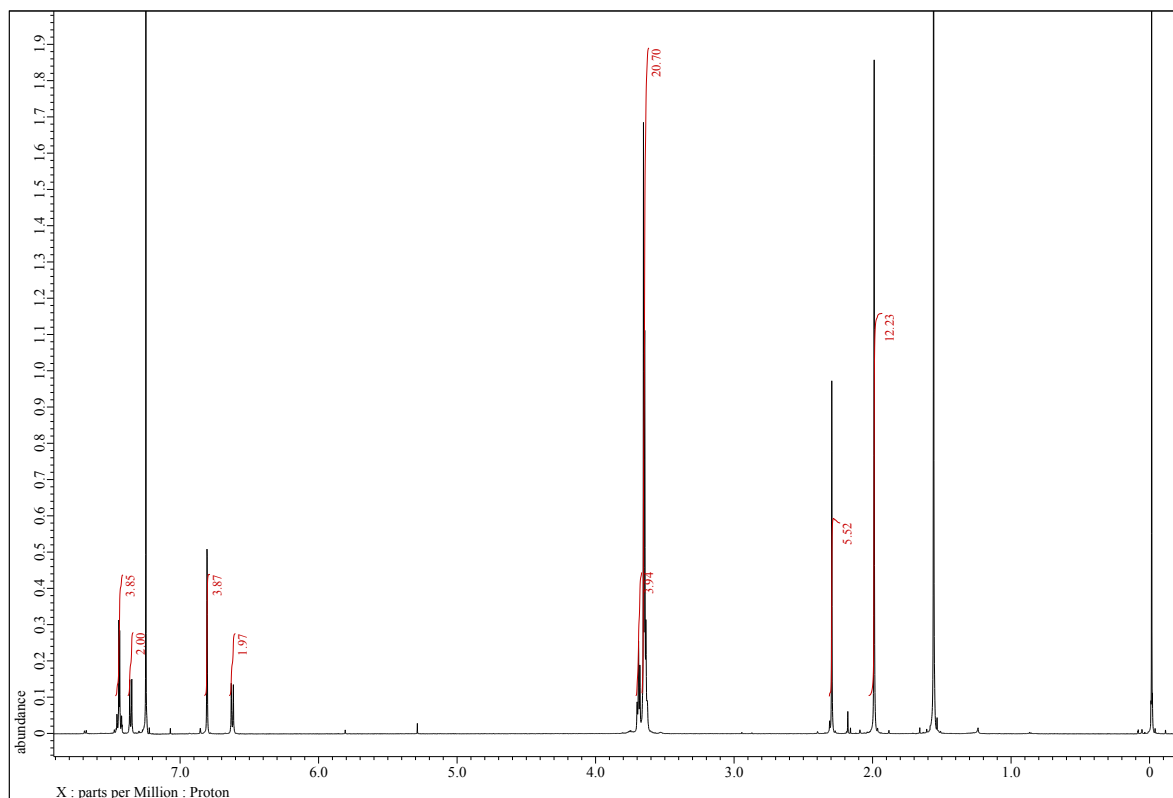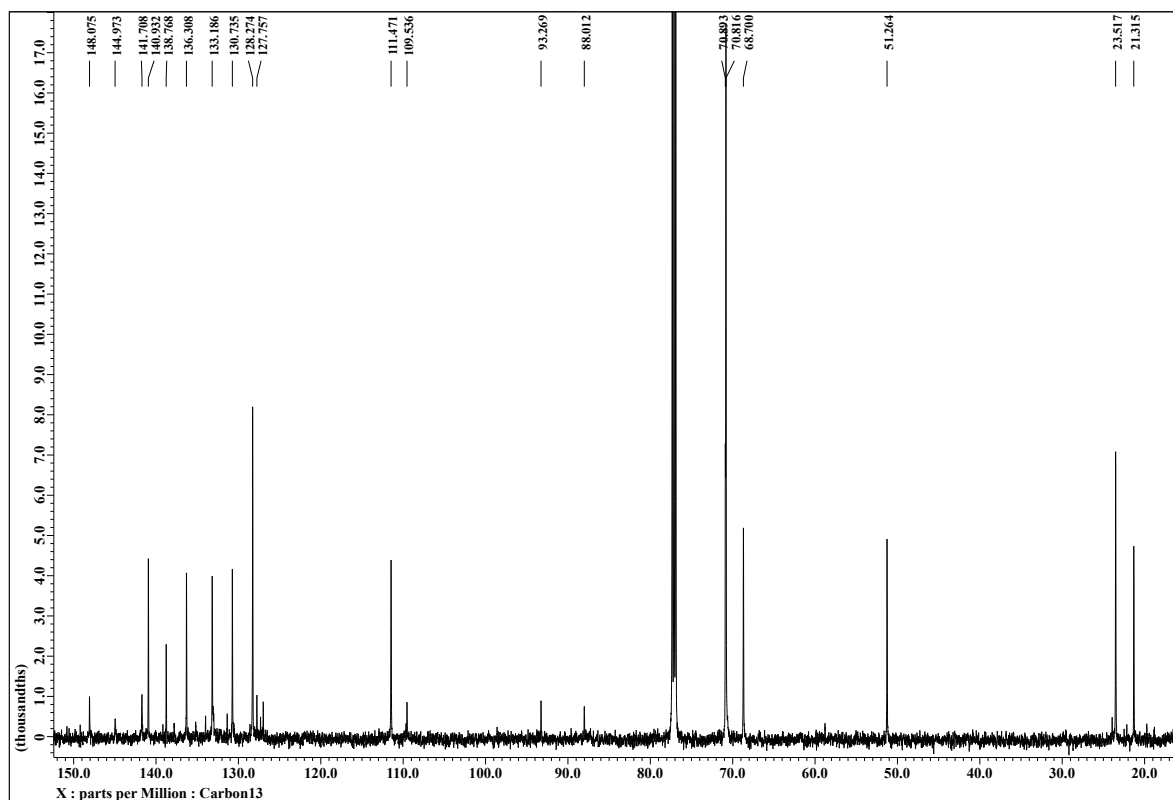

Fig. S11 <sup>1</sup>H (top) and <sup>13</sup>C (bottom) NMR spectra of L2 in CDCl<sub>3</sub>.



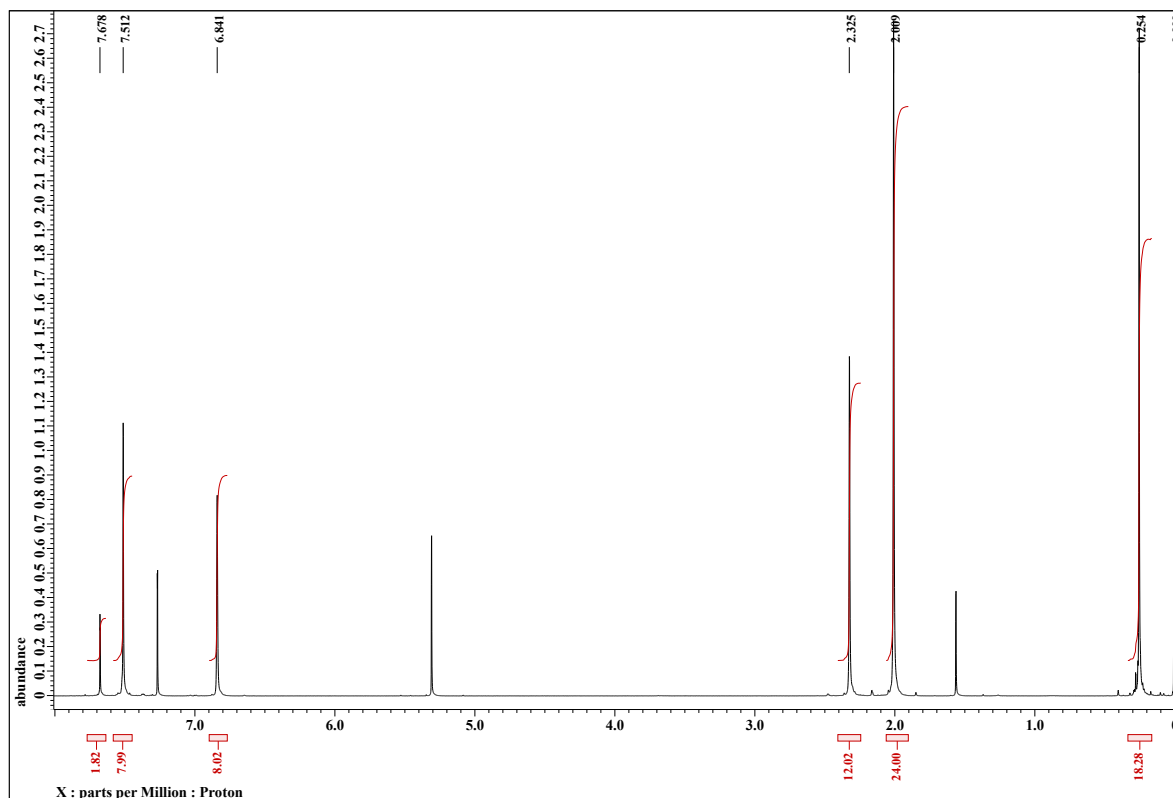

**Fig. S12** <sup>1</sup>H NMR spectrum of 1,4-bis[(trimethylsilyl)ethynyl]-2,5-bis{[(4-dimesitylboryl)phenyl]ethynyl}benzene in CDCl<sub>3</sub>.

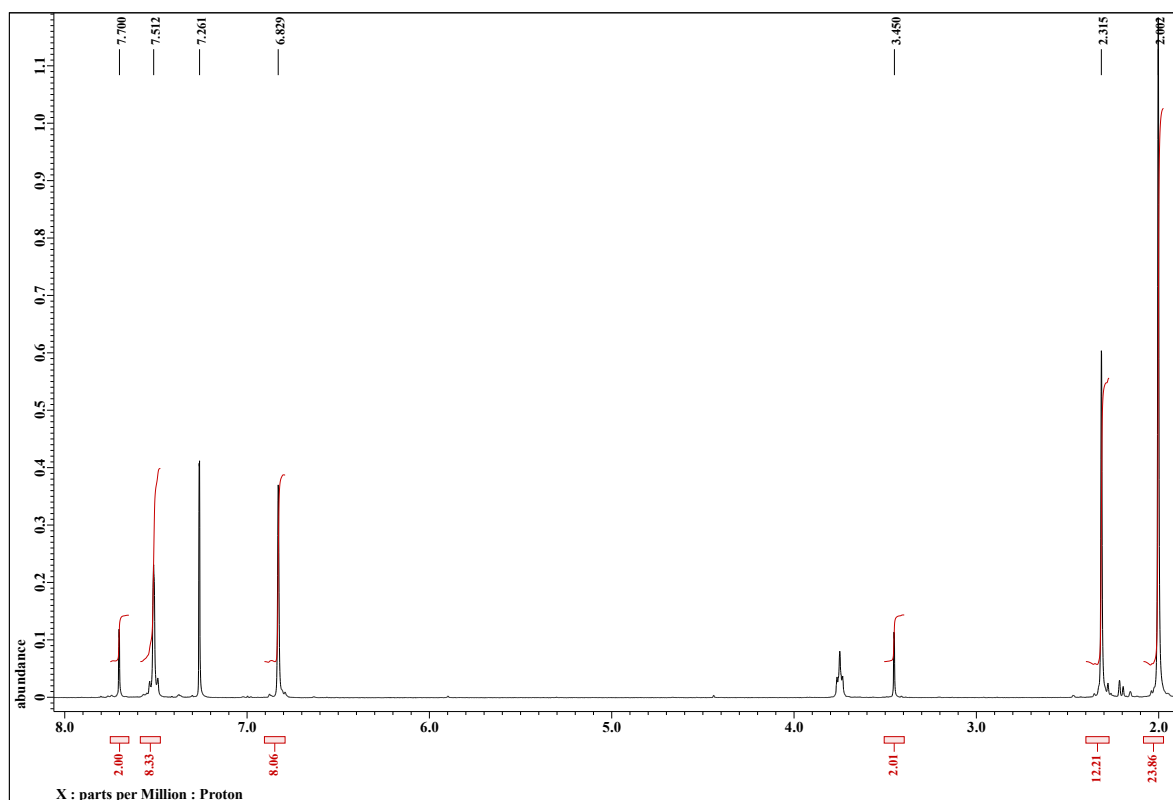

**Fig. S13** <sup>1</sup>H NMR spectrum of 1,4-diethynyl-2,5-bis{[(4-dimesitylboryl)phenyl]ethynyl}benzene in CDCl<sub>3</sub>.

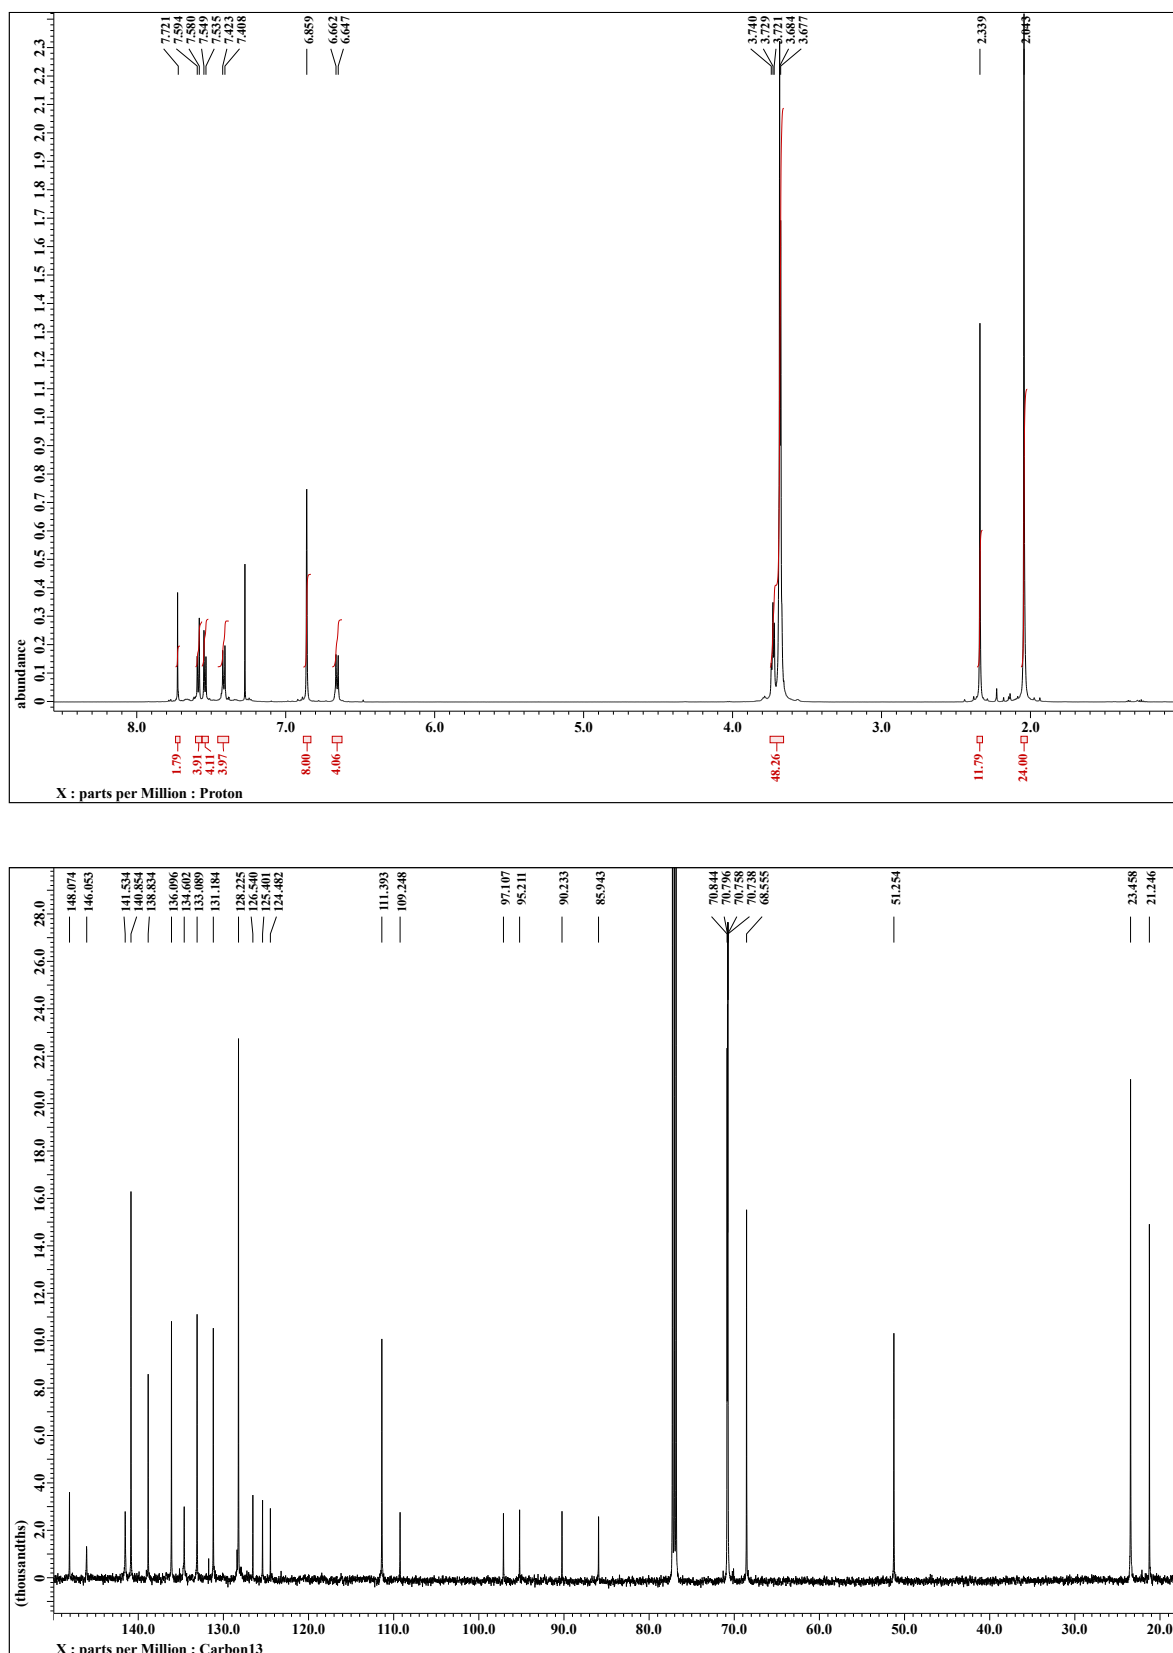

**Fig. S14** <sup>1</sup>H (top) and <sup>13</sup>C (bottom) NMR spectra of **X1** in CDCl<sub>3</sub>.

## 2. Optical properties

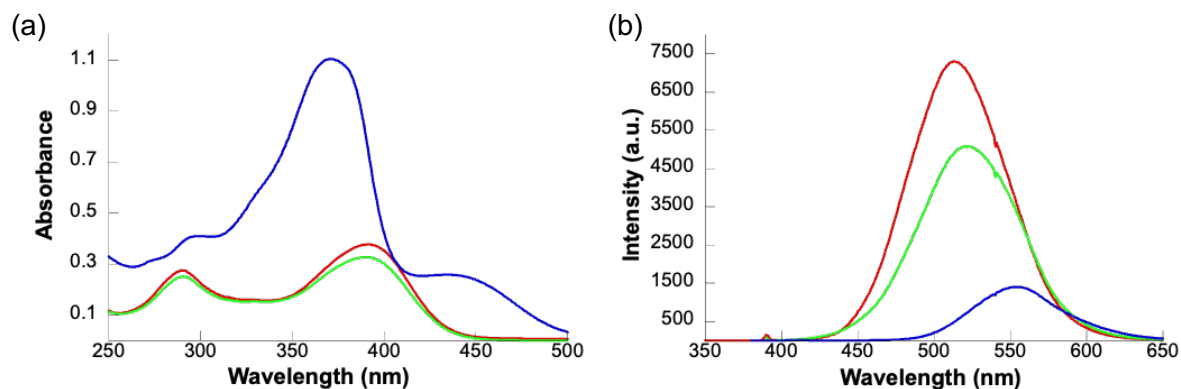

**Fig. S15** (a) UV/vis absorption and (b) fluorescence spectra of **L1** (red), **L2** (green), and **X1** (blue) in CH<sub>2</sub>Cl<sub>2</sub> (10<sup>-5</sup> M).

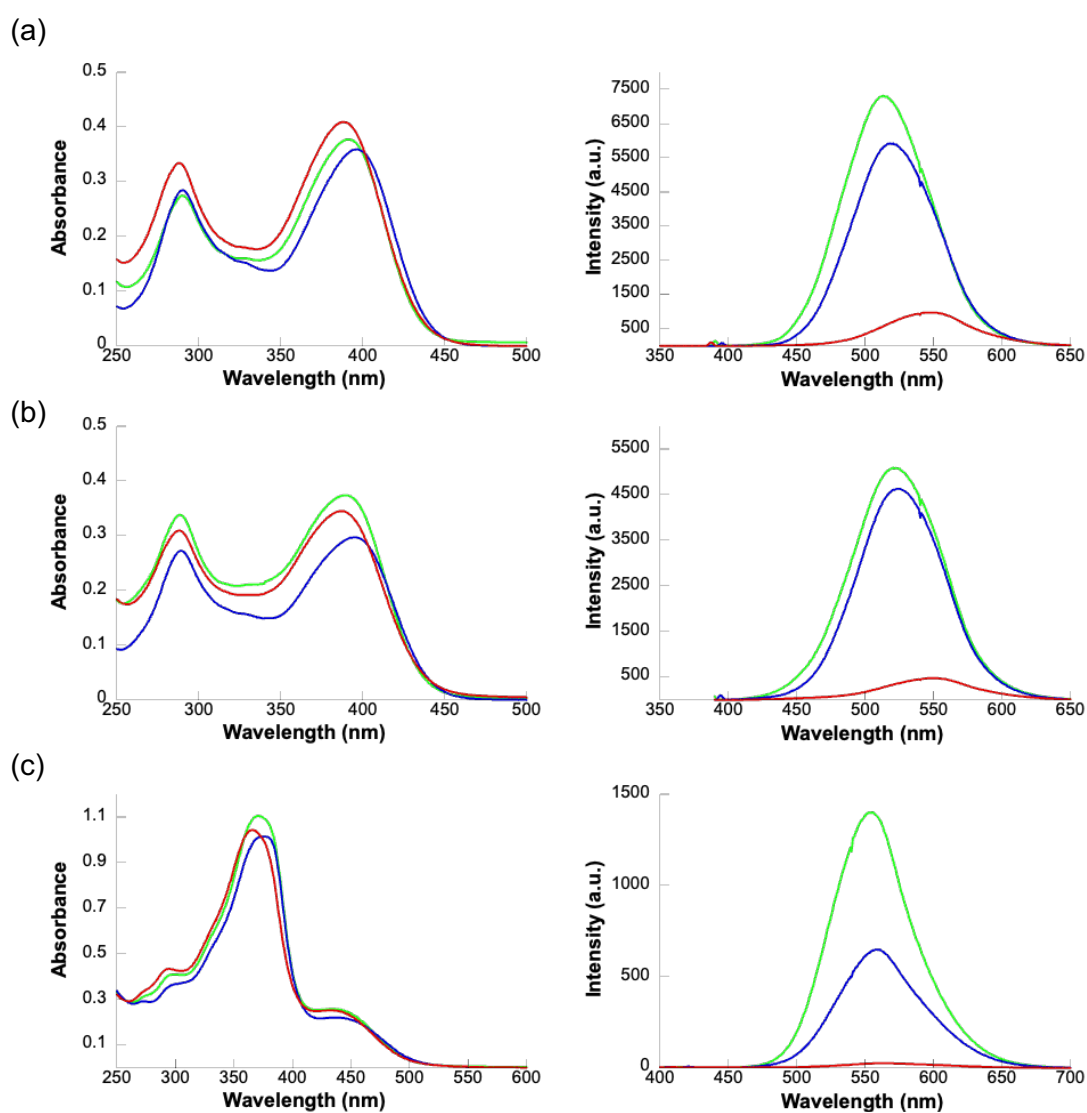

**Fig. S16** UV/vis absorption (left) and fluorescence spectra (right) of (a) **L1**, (b) **L2**, and (c) **X1** in CH<sub>2</sub>Cl<sub>2</sub> (green), THF (blue), and MeCN (red) (10<sup>-5</sup> M).

### 3. Ion-binding properties

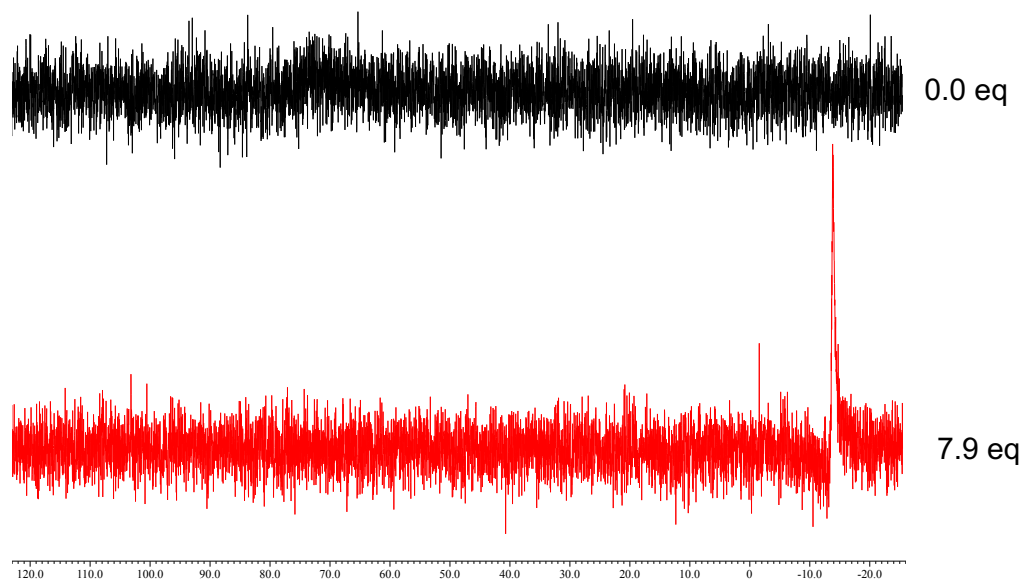

**Fig. S17**  $^{11}\text{B}$  NMR spectral changes of **L1** (1.2 mM) upon the addition of  $\text{CN}^-$  as TBA salt in  $\text{CD}_2\text{Cl}_2/\text{CD}_3\text{CN}$  (1:1) at 25 °C. The  $^{11}\text{B}$  NMR spectrum of **L1** showed broad signal at approximately 75 ppm, consistent with the trigonal planar geometry of the boron centre. Upon the addition of  $\text{CN}^-$  as a tetrabutylammonium ( $\text{TBA}^+$ ) salt, the original signal intensities decreased, and new peak appeared at -13.8 ppm.

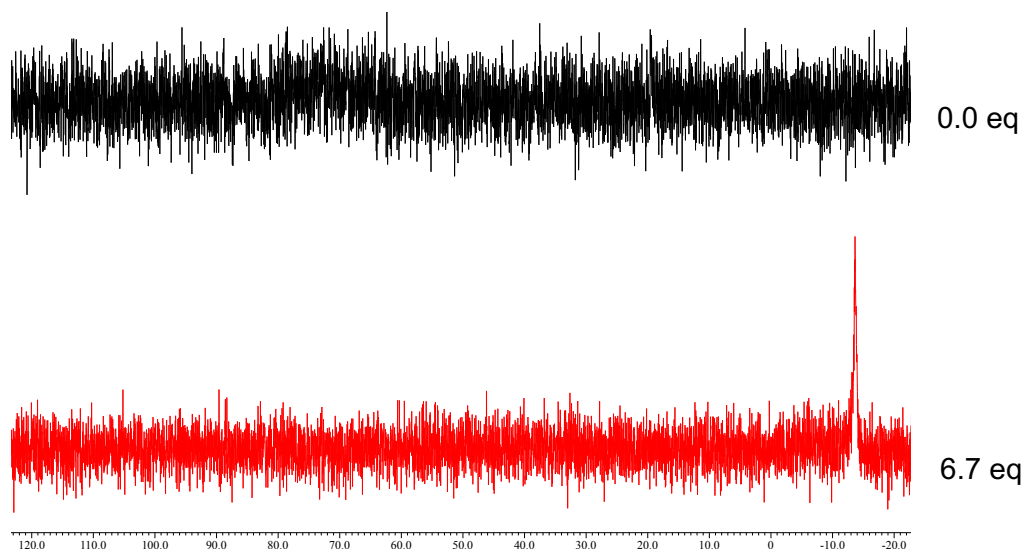

**Fig. S18**  $^{11}\text{B}$  NMR spectral changes of **L2** (1.2 mM) upon the addition of  $\text{CN}^-$  as TBA salt in  $\text{CD}_2\text{Cl}_2/\text{CD}_3\text{CN}$  (1:1) at 25 °C.  $^{11}\text{B}$  NMR spectrum of **L2** showed broad signal at approximately 75 ppm, consistent with the trigonal planar geometry of the boron centre. Upon the addition of  $\text{CN}^-$  as  $\text{TBA}^+$  salt, the original signal intensities decreased, and new peak appeared at -13.6 ppm.

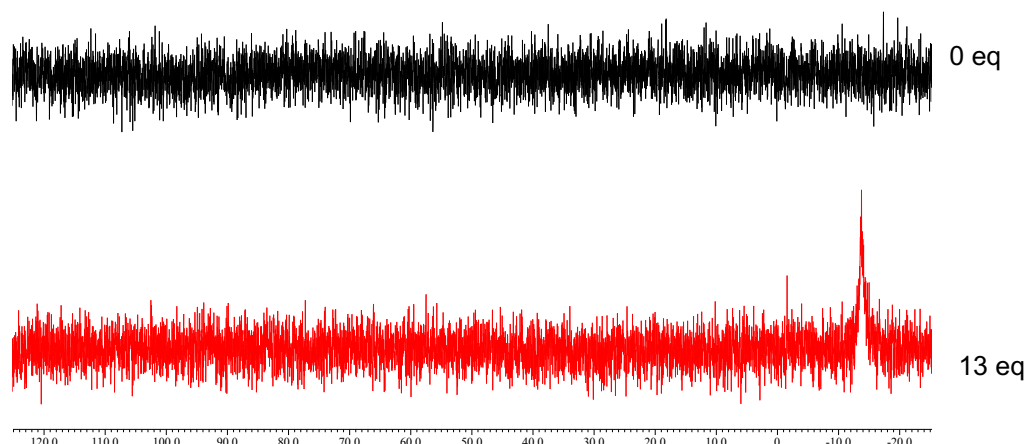

**Fig. S19**  $^{11}\text{B}$  NMR spectral changes of **X1** (1.2 mM) upon the addition of  $\text{CN}^-$  as TBA salt in  $\text{CD}_2\text{Cl}_2/\text{CD}_3\text{CN}$  (1:1) at 25 °C.  $^{11}\text{B}$  NMR spectrum of **X1** showed broad signal at approximately 75 ppm, consistent with the trigonal planar geometry of the boron centre. Upon the addition of  $\text{CN}^-$  as  $\text{TBA}^+$  salt, the original signal intensities decreased, and new peak appeared at  $-14.3$  ppm.

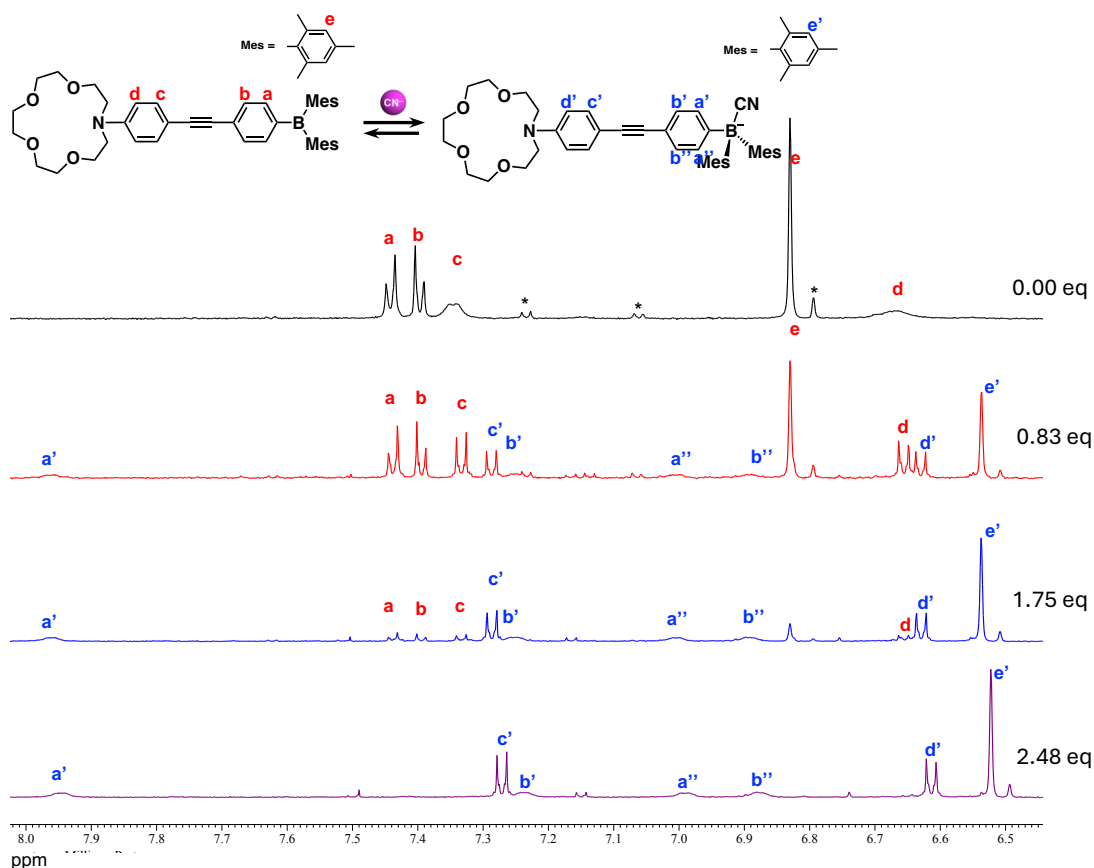

**Fig. S20**  $^1\text{H}$  NMR spectral changes of **L1** (1.2 mM) upon the addition of  $\text{CN}^-$  as  $\text{TBA}^+$  salt in  $\text{CD}_2\text{Cl}_2/\text{CD}_3\text{CN}$  (1:1) at 25 °C. The protons of the boron-substituted phenyl group split into four distinct signals ( $\text{a}'$ ,  $\text{a}''$ ,  $\text{b}'$ , and  $\text{b}''$ ) upon anion association. This splitting arises from steric hindrance that restricts rotation about the B–C bond, thereby lowering the molecular symmetry. Notably, the proton ( $\text{a}'$ ) subjected to the deshielding effect of the  $\text{CN}^-$  exhibited a pronounced downfield shift. These observations are in good agreement with the NMR spectra simulated by theoretical calculations. \* was not observed when only dichloromethane was used, and was therefore presumed to originate from the formation of a complex with acetonitrile.

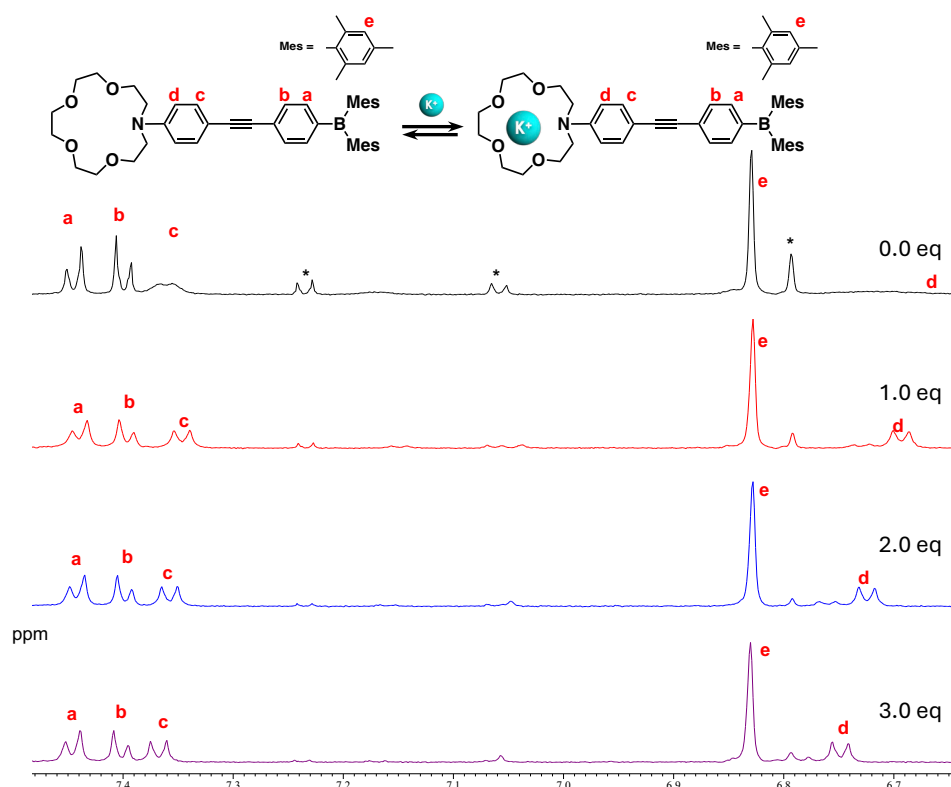

**Fig. S21**  $^1\text{H}$  NMR spectral changes of **L1** (1.2 mM) upon the addition of  $\text{K}^+$  as  $\text{PF}_6^-$  salt in  $\text{CD}_2\text{Cl}_2/\text{CD}_3\text{CN}$  (1:1) at  $25^\circ\text{C}$ . \* was not observed when only dichloromethane was used, and was therefore presumed to originate from the formation of a complex with acetonitrile.

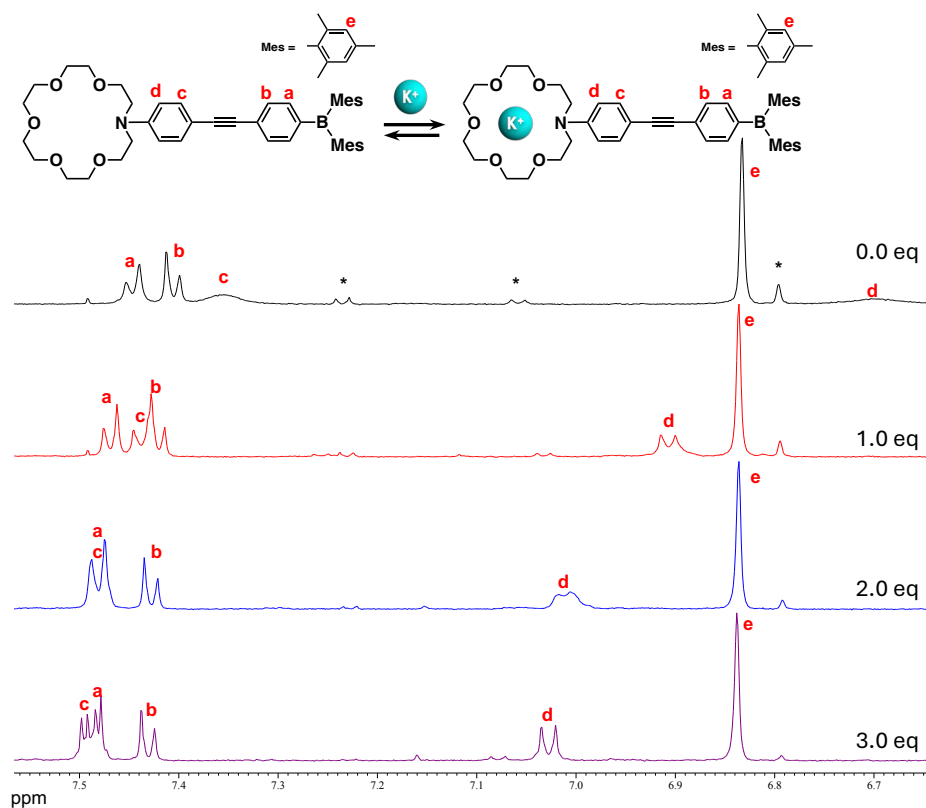

**Fig. S22**  $^1\text{H}$  NMR spectral changes of **L2** (1.2 mM) upon the addition of  $\text{K}^+$  as  $\text{PF}_6^-$  salt in  $\text{CD}_2\text{Cl}_2/\text{CD}_3\text{CN}$  (1:1) at  $25^\circ\text{C}$ . \* was not observed when only dichloromethane was used, and was therefore presumed to originate from the formation of a complex with acetonitrile.

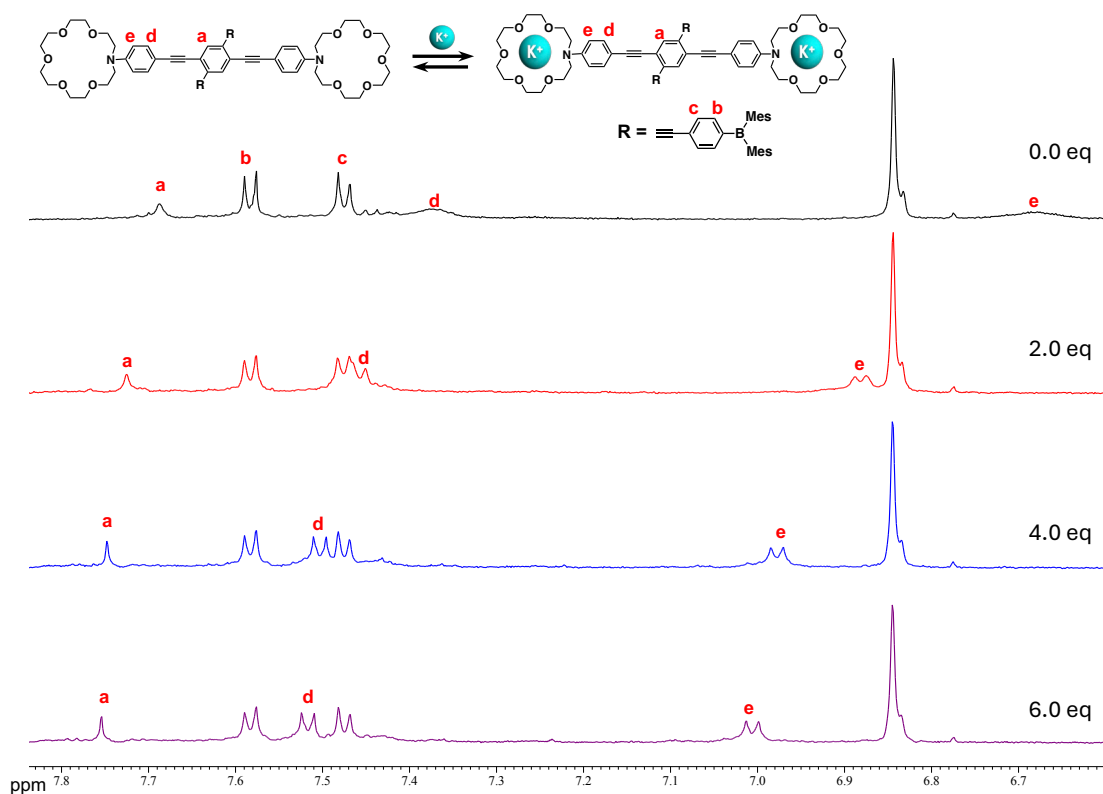

**Fig. S23**  $^1\text{H}$  NMR spectral changes of **X1** (0.6 mM) upon the addition of  $\text{K}^+$  as  $\text{PF}_6^-$  salt in  $\text{CD}_2\text{Cl}_2/\text{CD}_3\text{CN}$  (1:1) at  $25^\circ\text{C}$ .

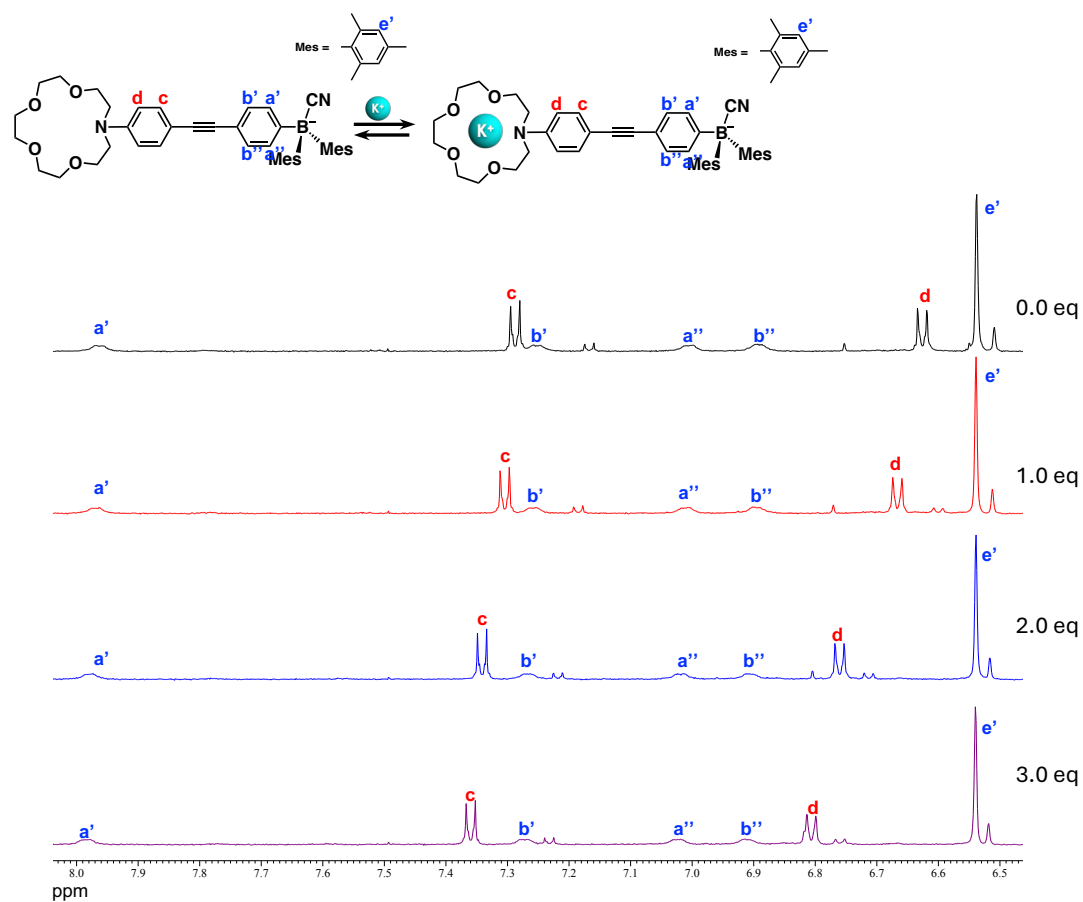

**Fig. S24**  $^1\text{H}$  NMR spectral changes of **L1-CN** (1.2 mM) upon the addition of  $\text{K}^+$  as  $\text{PF}_6^-$  salt in  $\text{CD}_2\text{Cl}_2/\text{CD}_3\text{CN}$  (1:1) at  $25^\circ\text{C}$ . **L1-CN** was prepared by the mixture of **L1** and 3 eq. of TBACN.

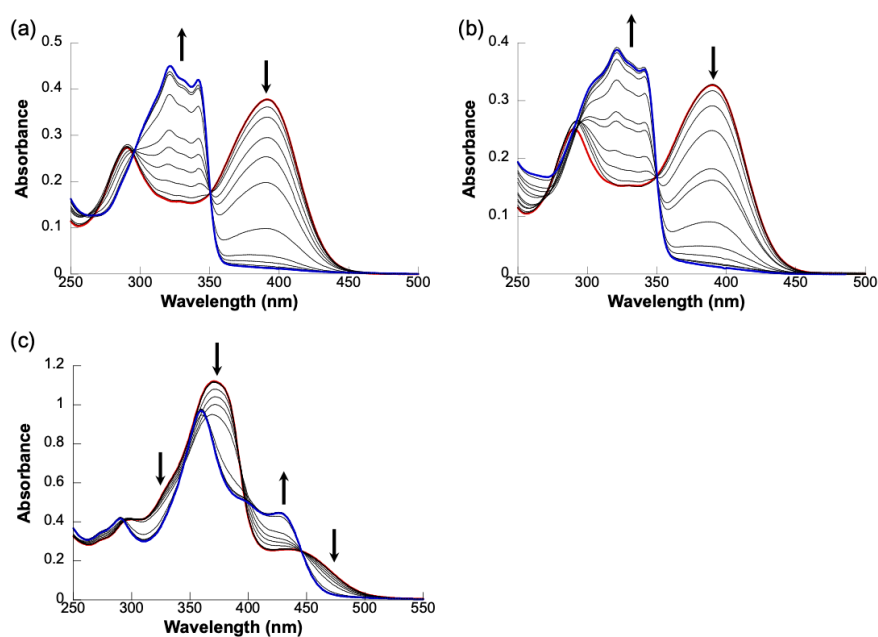

**Fig. S25** UV/vis absorption spectral changes of (a) L1, (b) L2, and (c) X1 upon the addition of  $F^-$  as TBA salt in  $CH_2Cl_2$  ( $10^{-5}$  M).

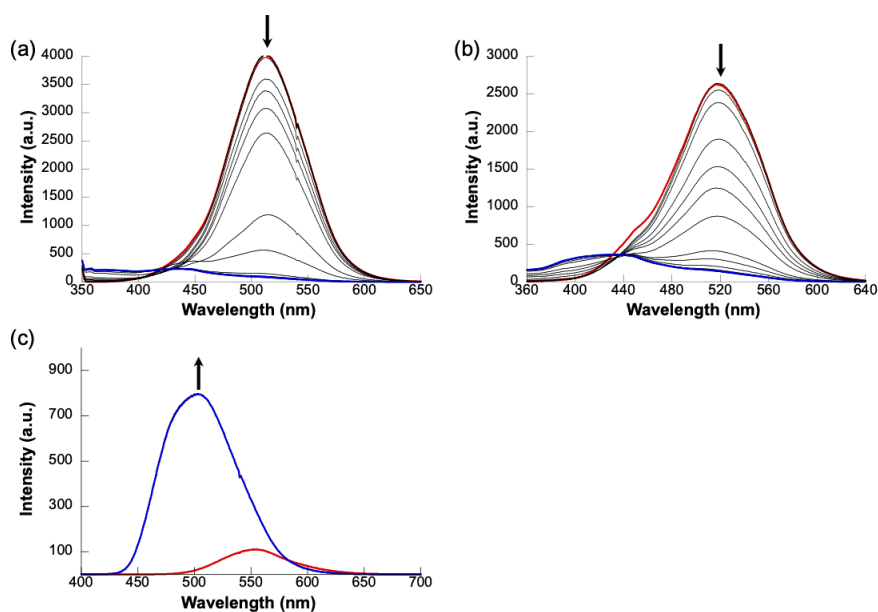

**Fig. S26** Fluorescence spectral changes of (a) L1, (b) L2, and (c) X1 upon the addition of  $F^-$  as TBA salt in  $CH_2Cl_2$  ( $10^{-5}$  M). The fluorescence spectra of (a) and (b) were obtained by excitation at isosbestic points of anion titration, and (c) were obtained by excitation at absorption maxima. (See Fig. S25).



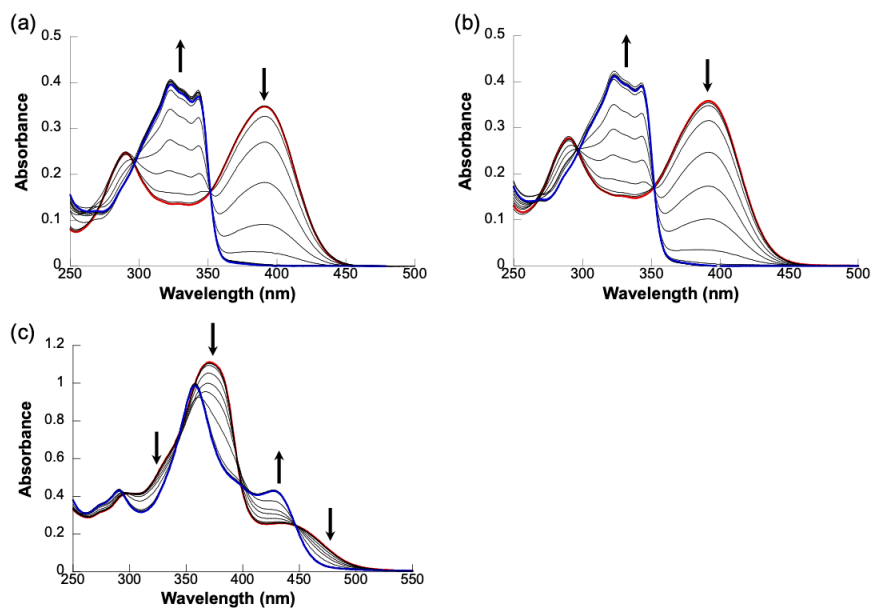

**Fig. S27** UV/vis absorption spectral changes of (a) **L1**, (b) **L2**, and (c) **X1** upon the addition of  $\text{CN}^-$  as TBA salt in  $\text{CH}_2\text{Cl}_2$  ( $10^{-5}$  M).

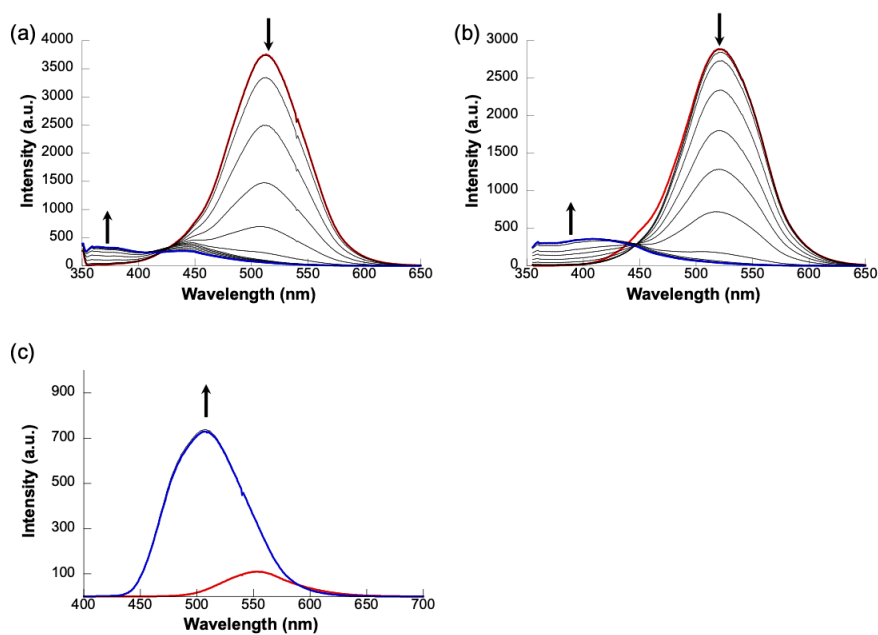

**Fig. S28** Fluorescence spectral changes of (a) **L1**, (b) **L2**, and (c) **X1** upon the addition of  $\text{CN}^-$  as TBA salt in  $\text{CH}_2\text{Cl}_2$  ( $10^{-5}$  M). The fluorescence spectra of (a) and (b) were obtained by excitation at isosbestic points of anion titration, and (c) were obtained by excitation at absorption maxima. (See Fig. S27).

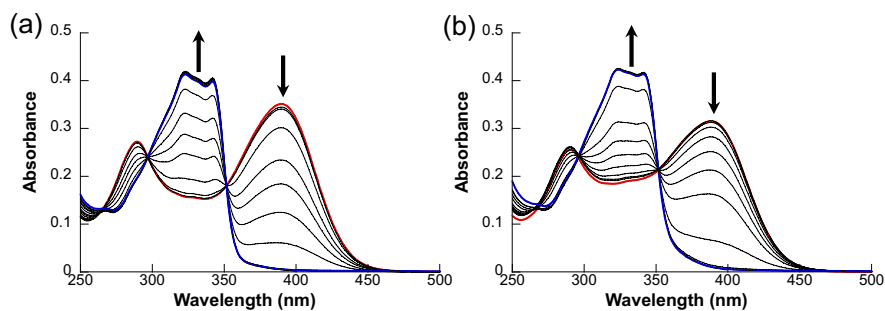

**Fig. S29** UV/vis absorption spectral changes of (a) **L1** and (b) **L2** upon the addition of  $\text{CN}^-$  as TBA salt in  $\text{CH}_2\text{Cl}_2/\text{MeCN}$  (1:1) ( $10^{-5}$  M).

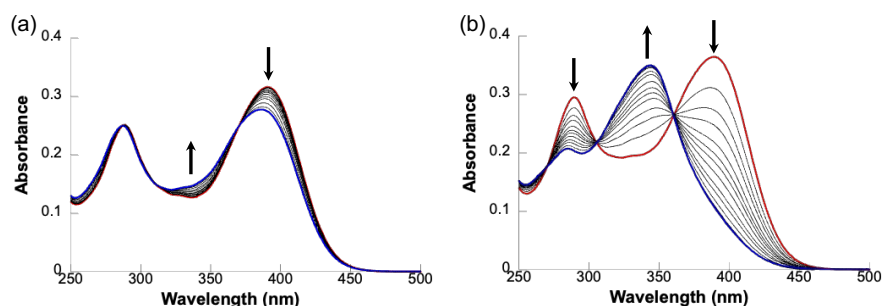

**Fig. S30** UV/vis absorption spectral changes of (a) **L1** and (b) **L2** upon the addition of  $K^+$  as  $PF_6$  salt in  $CH_2Cl_2/MeCN$  (1:1) ( $10^{-5}$  M).

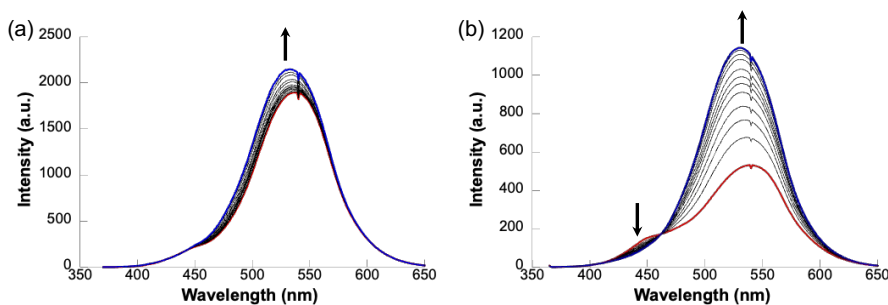

**Fig. S31** Fluorescence spectral changes of (a) **L1** and (b) **L2** upon the addition of  $K^+$  as  $PF_6$  salt in  $CH_2Cl_2/MeCN$  (1:1) ( $10^{-5}$  M). The fluorescence spectra were obtained by excitation at isosbestic points of anion titration. (See Fig. S30).

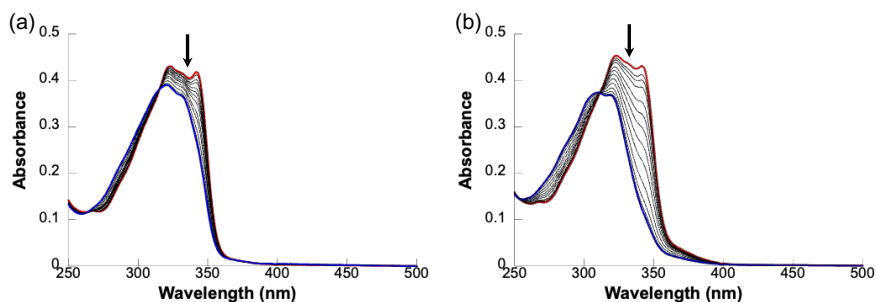

**Fig. S32** UV/vis absorption spectral changes of (a) **L1-CN** and (b) **L2-CN** upon the addition of  $K^+$  as  $KPF_6$  salt in  $CH_2Cl_2/MeCN$  (1:1) ( $10^{-5}$  M). **L1-CN** and **L2-CN** were prepared by the mixture of **L1** and **L2** and 3 eq. of TBACN.

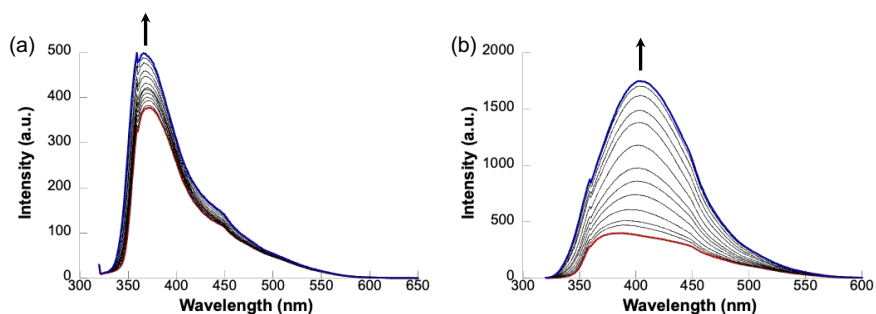

**Fig. S33** Photoluminescence spectral changes of (a) **L1-CN** and (b) **L2-CN** upon the addition of  $K^+$  as  $KPF_6$  salt in  $CH_2Cl_2/MeCN$  (1:1) ( $10^{-5}$  M). **L1-CN** and **L2-CN** were prepared by the mixture of **L1** and **L2** with 3 eq. of TBACN. The fluorescence spectra were obtained by excitation at isosbestic points of anion titration. (See Fig. S32).

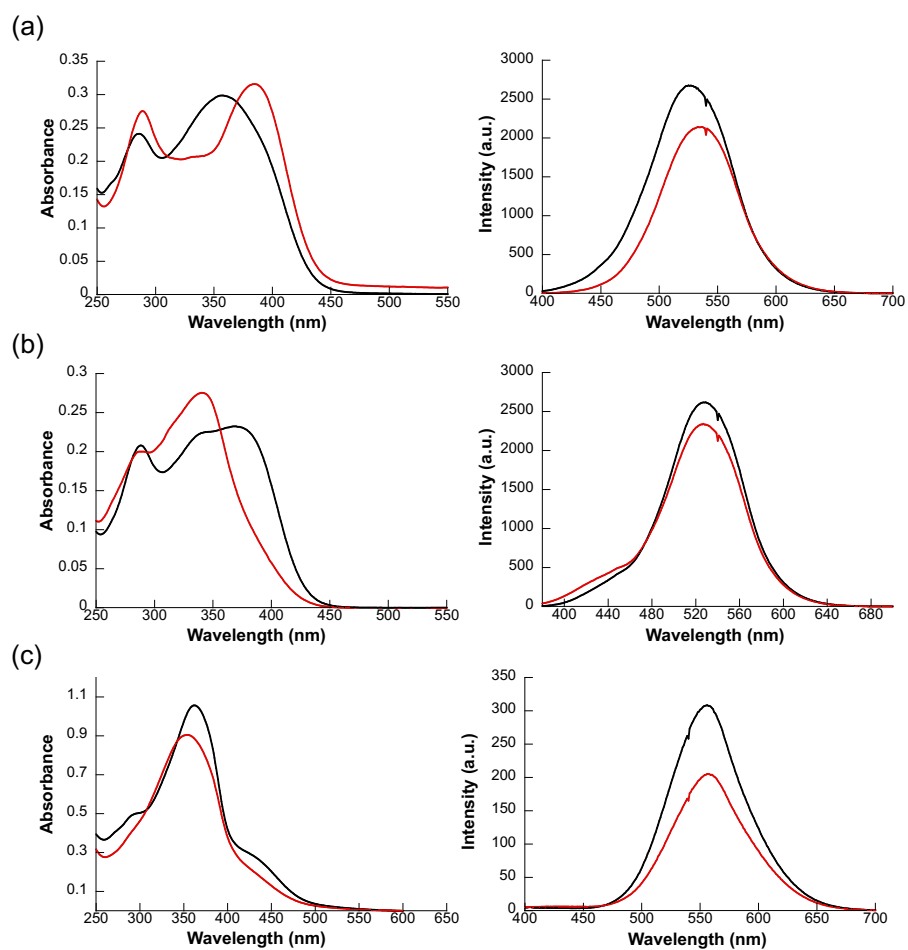

**Fig. S34** UV/vis absorption (left) and fluorescence (right) spectra of (a) **L1**, (b) **L2**, and (c) **X1** upon addition of excess  $\text{NaClO}_4$  (black) and  $\text{KPF}_6$  (red) in  $\text{CH}_2\text{Cl}_2/\text{MeCN}$  (1:1). The fluorescence spectra were obtained by excitation at absorption maxima.

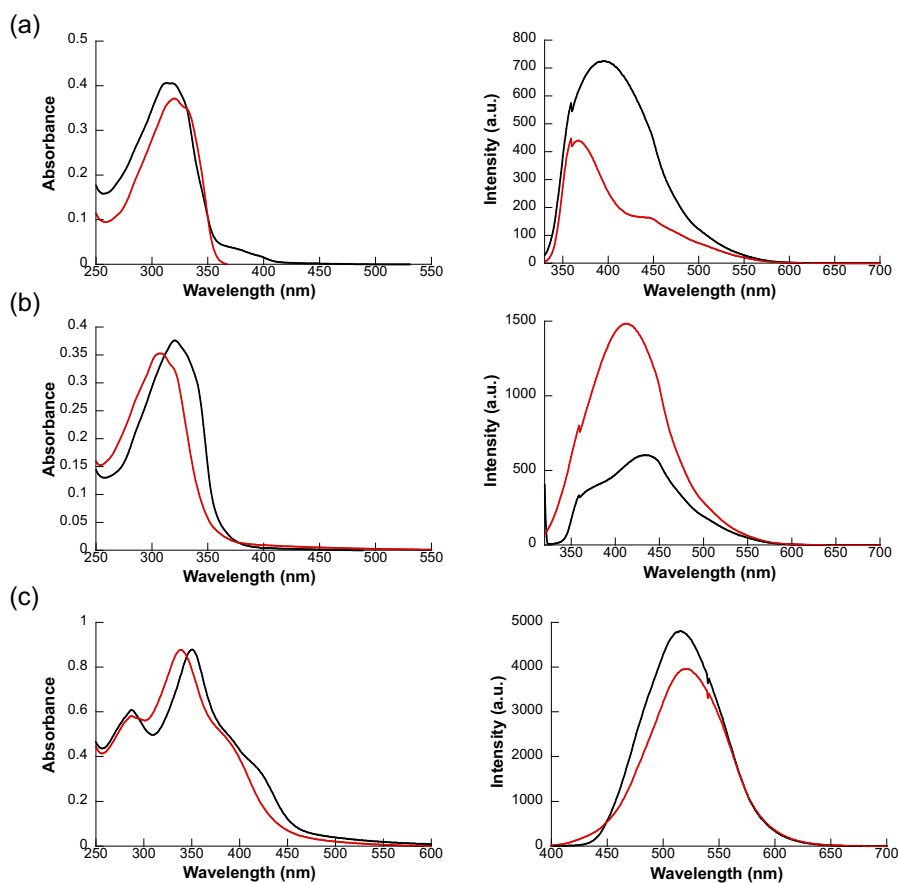

**Fig. S35** UV/vis absorption (left) and fluorescence (right) spectra of (a) **L1**–CN, (b) **L2**–CN, and (c) **X1**–(CN)<sub>2</sub> upon addition of excess NaClO<sub>4</sub> (black) and KPF<sub>6</sub> (red) in CH<sub>2</sub>Cl<sub>2</sub>/MeCN (1:1). The fluorescence spectra were obtained by excitation at absorption maxima.

**Table S1** Summary of fluorescence quantum yields ( $\Phi_F$ ) of **L1**, **L2**, and **X1** in CH<sub>2</sub>Cl<sub>2</sub>/MeCN (1:1).

|           | $\Phi_F$ (%) |        |                   |                     |                         |                           |
|-----------|--------------|--------|-------------------|---------------------|-------------------------|---------------------------|
|           | free         | +TBACN | +KPF <sub>6</sub> | +NaClO <sub>4</sub> | +TBACN/KPF <sub>6</sub> | +TBACN/NaClO <sub>4</sub> |
| <b>L1</b> | 54           | 5      | 60                | >99                 | 7                       | 13                        |
| <b>L2</b> | 44           | 8      | >99               | 87                  | 31                      | 10                        |
| <b>X1</b> | 12           | >99    | 26                | 28                  | >99                     | >99                       |

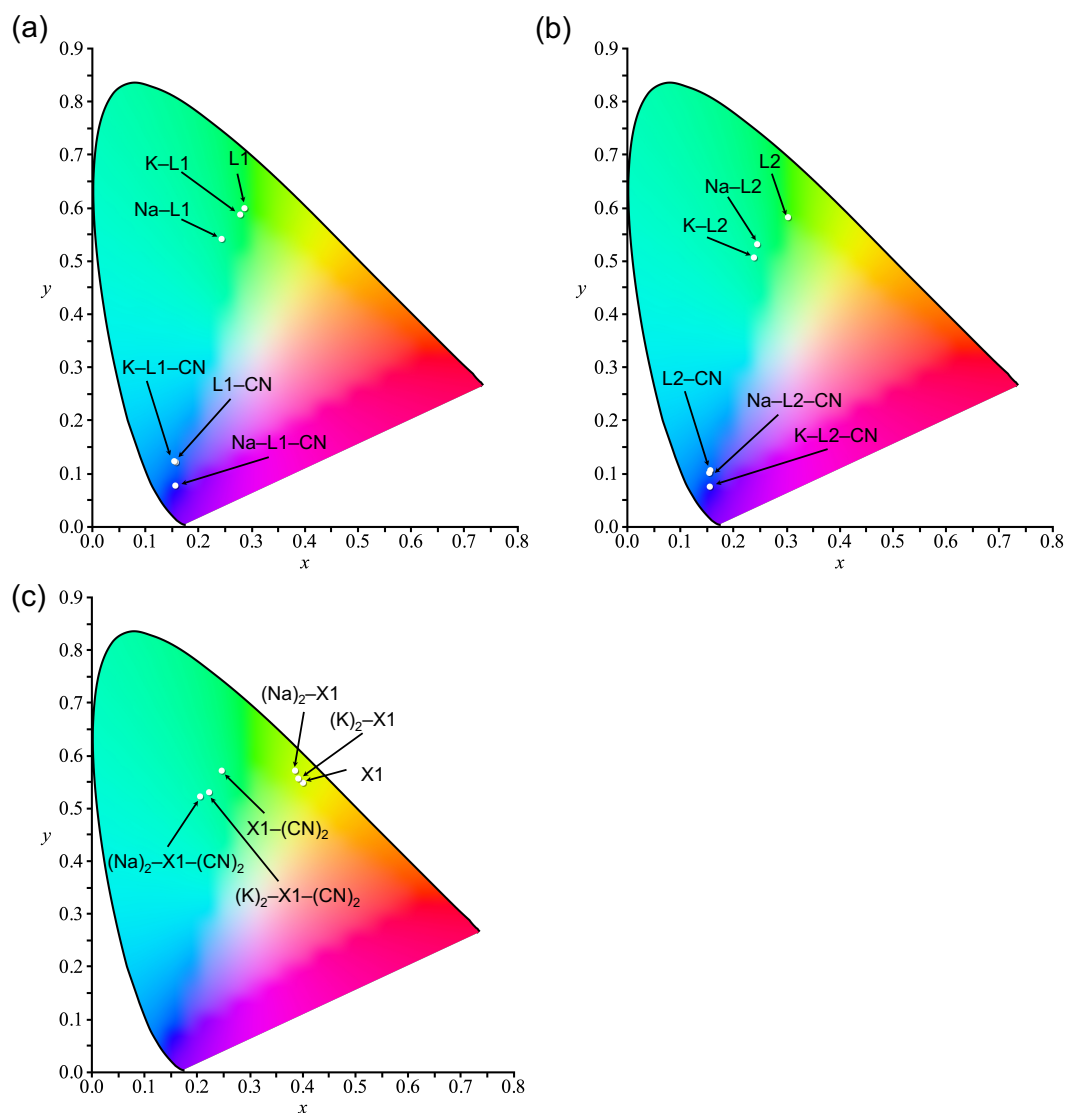

**Fig. S36** Emission colour coordinates of (a) **L1**, (b) **L2**, and (c) **X1** with various ion pairs in the CIE 1931 chromaticity diagram.

**Table S2** Summary of emission colour coordinates of **L1**, **L2**, and **X1** with various ion pairs in the CIE 1931 chromaticity diagram.

|                            | <b>L1</b>     | <b>L2</b>     | <b>X1</b>     |
|----------------------------|---------------|---------------|---------------|
| free                       | (0.286,0.601) | (0.302,0.584) | (0.400,0.550) |
| +TBACN                     | (0.157,0.122) | (0.156,0.107) | (0.246,0.573) |
| +KPF <sub>6</sub>          | (0.278,0.589) | (0.238,0.508) | (0.391,0.558) |
| +NaClO <sub>4</sub>        | (0.243,0.543) | (0.244,0.533) | (0.385,0.573) |
| +TBACN +KPF <sub>6</sub>   | (0.154,0.124) | (0.155,0.076) | (0.222,0.532) |
| +TBACN +NaClO <sub>4</sub> | (0.156,0.078) | (0.154,0.102) | (0.205,0.524) |

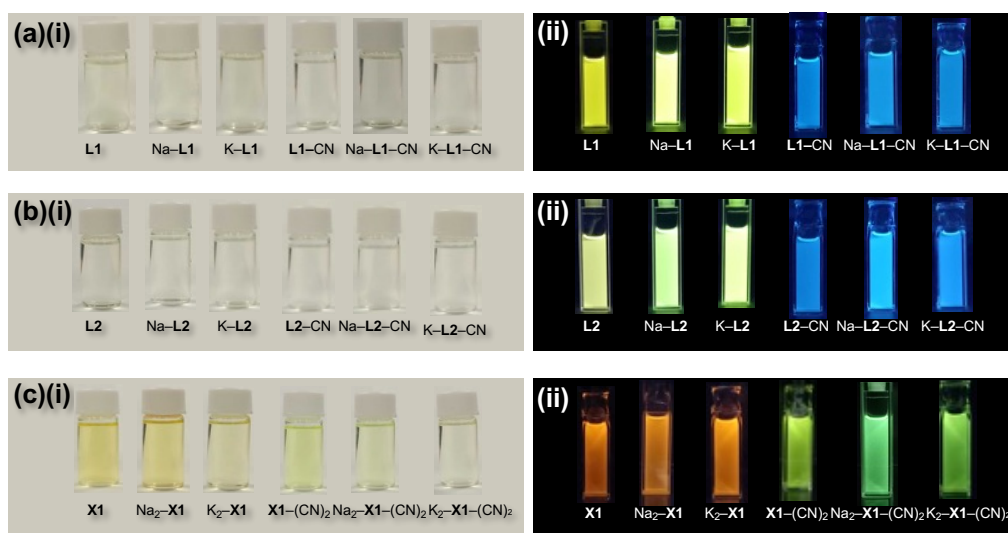

**Fig. S37** Photographs of (a) **L1**, (b) **L2**, and (c) **X1** with various ion pairs (i) under visible light and (ii) UV irradiation.

#### 4. Theoretical calculations

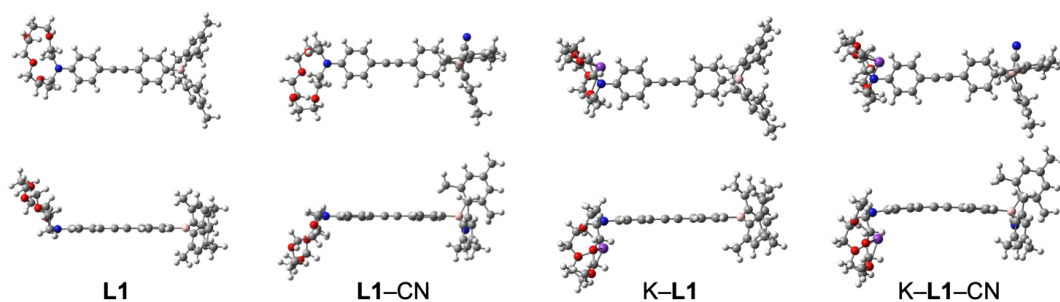

Fig. S38 Optimized structures of L1, L1-CN, K-L1, and K-L1-CN at B3LYP/6-31G(d,p) level.

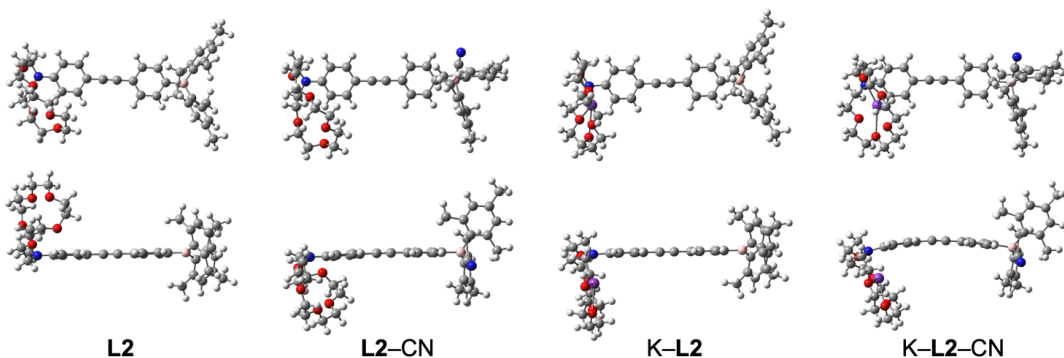

Fig. S39 Optimized structures of L2, L2-CN, K-L2, and K-L2-CN at B3LYP/6-31G(d,p) level.

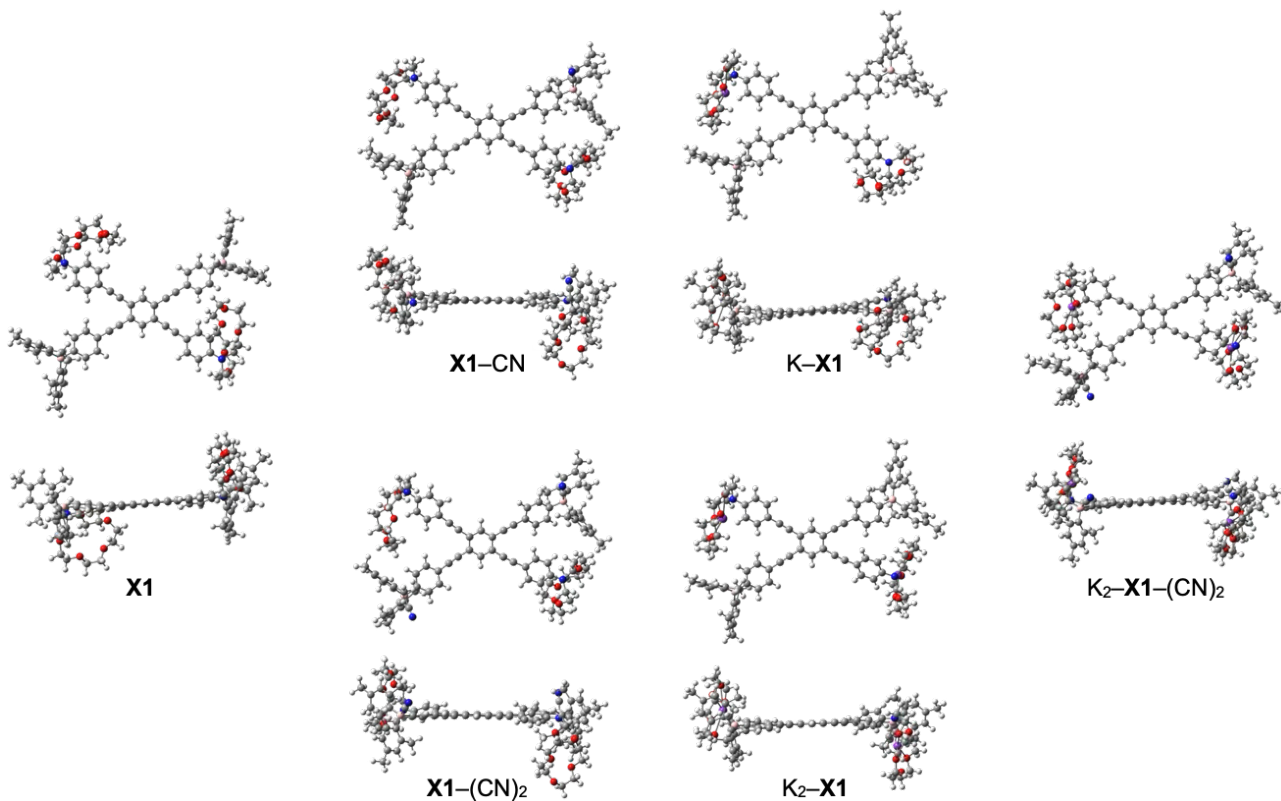

Fig. S40 Optimized structures of X1, X1-CN, X1-(CN)<sub>2</sub>, K-X1, K<sub>2</sub>-X1 and K<sub>2</sub>-X1-(CN)<sub>2</sub> at B3LYP/6-31G(d,p) level.

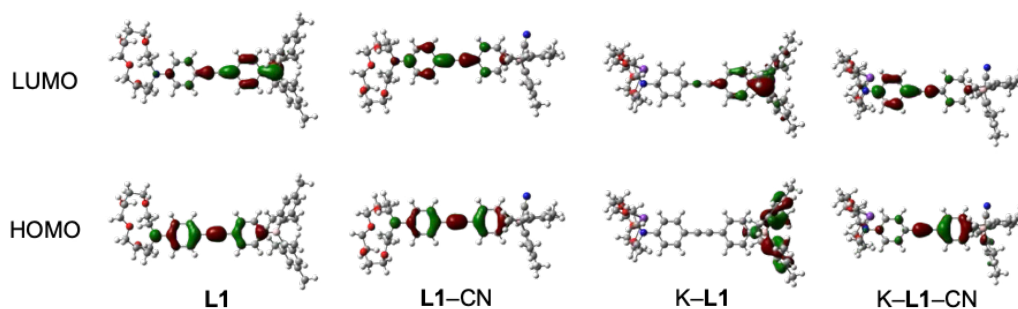

**Fig. S41** Frontier molecular orbitals (HOMO and LUMO) of **L1**, **L1-CN**, **K-L1** and **K-L1-CN** calculated at TD-cam-B3LYP/6-31G(d)//B3LYP/6-31G(d,p) level. Although the HOMO and LUMO are localized predominantly on the donor and acceptor units, respectively, both orbitals are delocalized over the diphenylacetylene framework.

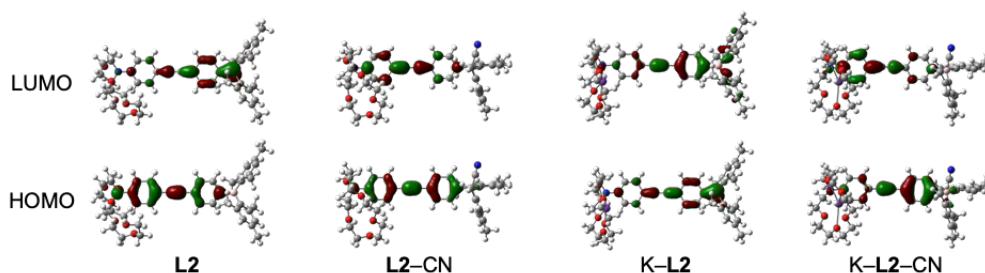

**Fig. S42** Frontier molecular orbitals (HOMO and LUMO) of **L2**, **L2-CN**, **K-L2** and **K-L2-CN** calculated at TD-cam-B3LYP/6-31G(d)//B3LYP/6-31G(d,p) level. Although the HOMO and LUMO are localized predominantly on the donor and acceptor units, respectively, both orbitals are delocalized over the diphenylacetylene framework.

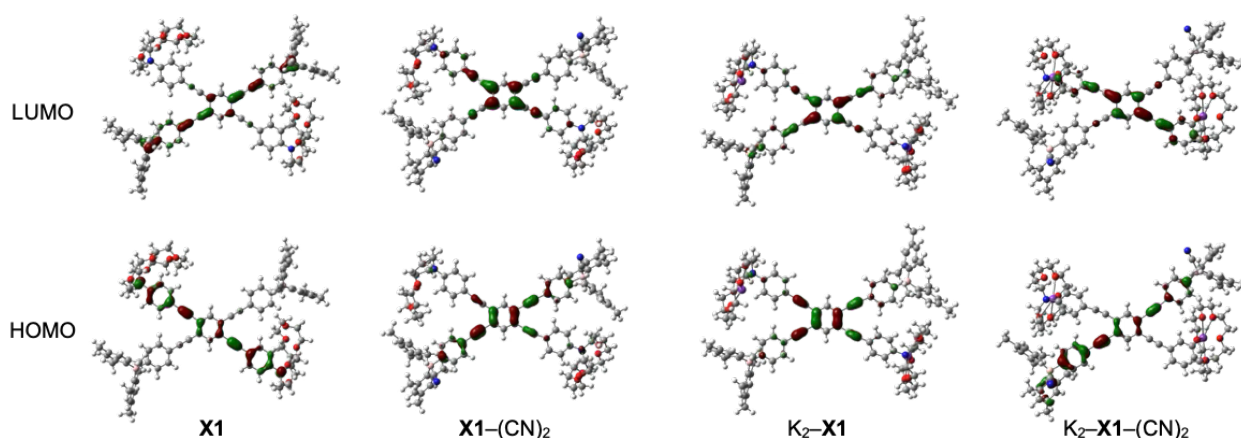

**Fig. S43** Frontier molecular orbitals (HOMO and LUMO) of **X1**, **X1-(CN)<sub>2</sub>**, **K<sub>2</sub>-X1** and **K<sub>2</sub>-X1-(CN)<sub>2</sub>** calculated at TD-cam-B3LYP/6-31G(d)//B3LYP/6-31G(d,p) level. In compound **X1**, the HOMO and LUMO are localized on the bis(phenylethynyl)benzene units bearing the azacrown ether and the dimesitylborane moieties, respectively. In contrast, in **K<sub>2</sub>-X1-(CN)<sub>2</sub>**, the HOMO is localized on the bis(phenylethynyl)benzene substituted with the boron-anion complex, while the LUMO is localized on the counterpart bearing the azacrown ether-cation complex. These results indicate that, even in the ion-pair complex, the HOMO and LUMO remain spatially separated, similar to the ion-free form.

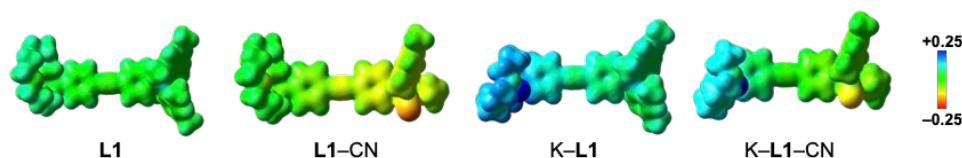

**Fig. S44** Electron density diagrams of **L1**, **L1-CN**, **K-L1**, and **K-L1-CN** estimated by electrostatic potential (ESP) mapped onto the electron density isosurface ( $\% = 0.01$ ) calculated at B3LYP/6-31+G(d,p) level for the optimized structures.



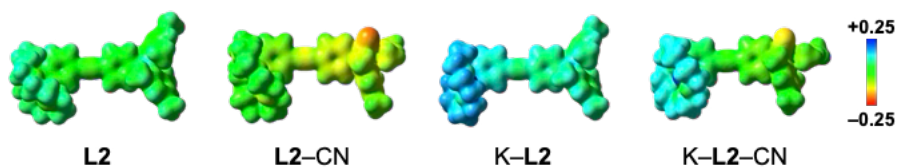

**Fig. S45** Electron density diagrams of **L2**, **L2-CN**, **K-L2**, and **K-L2-CN** estimated by electrostatic potential (ESP) mapped onto the electron density isosurface ( $\% = 0.01$ ) calculated at B3LYP/6-31+G(d,p) level for the optimized structures.

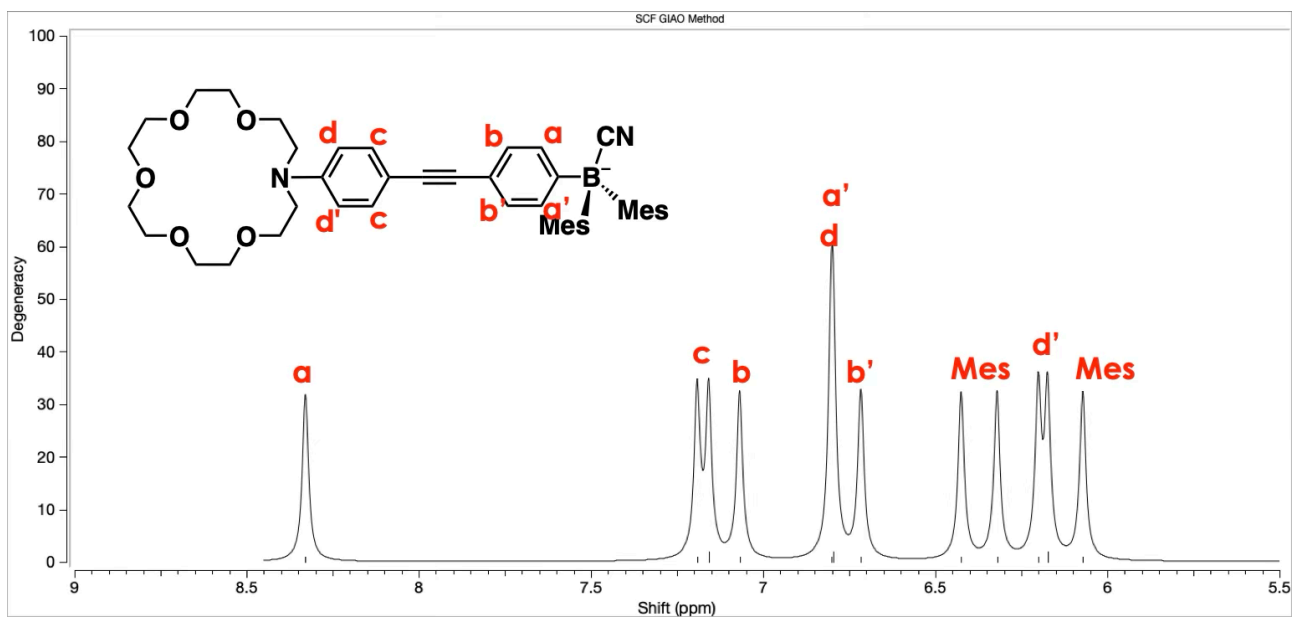

**Fig. S46** Simulated  $^1\text{H}$  NMR spectrum of **L2-CN** calculated at GIAO B3LYP/6-311+G(d)//B3LYP/6-31G(d,p).

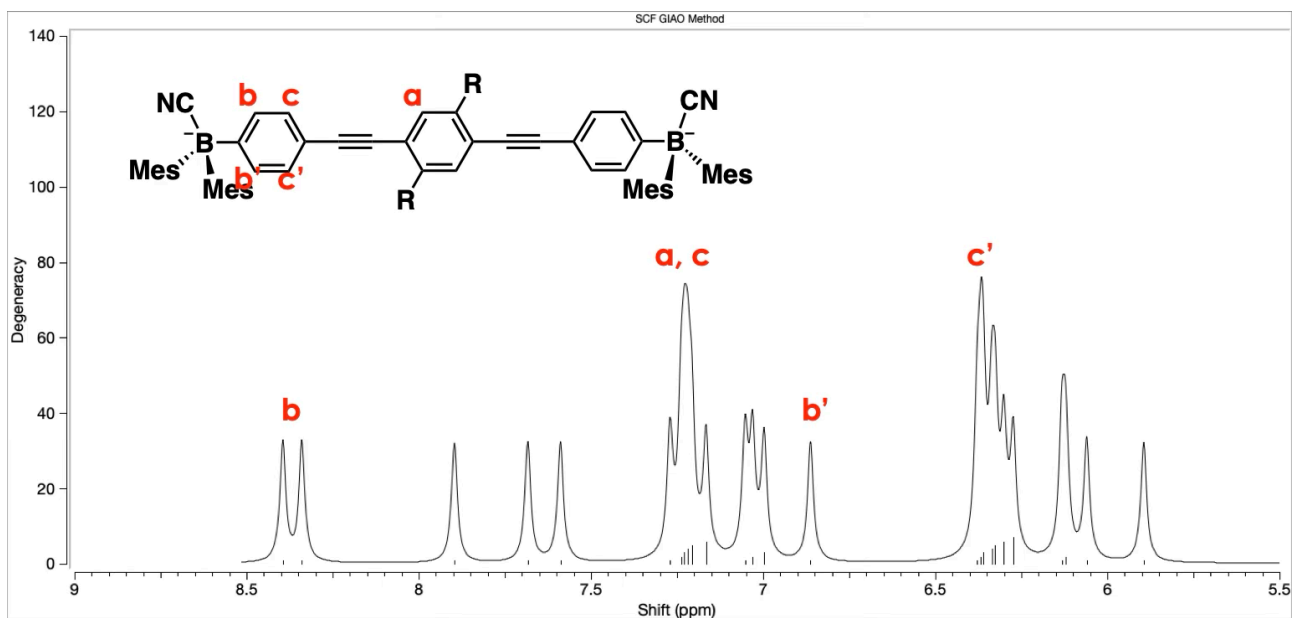

**Fig. S47** Simulated  $^1\text{H}$  NMR spectrum of **X1-(CN)<sub>2</sub>** calculated at GIAO B3LYP/6-311+G(d)//B3LYP/6-31G(d,p).
